# Supplementary material for: Healthy Prenatal Dietary Pattern and Offspring Autism
Source: PubMed Central journal article supplement (PMC11258593; doi:10.1001/jamanetworkopen.2024.22815), 2024-07-18
Supplement: jamanetwopen-e2422815-s001.pdf [file jamanetwopen-e2422815-s001.pdf]

## Supplemental Online Content

Friel C, Leyland AH, Anderson JJ, Havdahl A, Brantsæter AL, Dundasa R. Healthy prenatal dietary pattern and offspring autism. *JAMA Netw Open*. 2024;7(7):e2422815. doi:10.1001/jamanetworkopen.2024.22815

### **eAppendix 1.** Dietary Patterns

**eTable 1.** Food Items and Factor Loadings Representing a Healthy Prenatal Dietary Pattern

**eTable 2.** Food Items and Factor Loadings of the Subgroups of a Healthy Prenatal Dietary Pattern

**eTable 3.** Estimated Nutrient Intakes in ALSPAC and MoBa by Level of Adherence to a Healthy Prenatal Dietary Pattern

### **eAppendix 2.** Explanation of Directed Acyclic Graph

**eFigure 1.** Directed Acyclic Graph of Relationship Between Healthy Prenatal Dietary Pattern and Autism-Related Outcomes

### **eAppendix 3.** Covariates

### **eAppendix 4.** Sensitivity Analyses

**eTable 4.** Variables Used in Imputation Models

**eTable 5.** Baseline Characteristics of Pregnancies With Missing Outcome Data at Age Three in MoBa

**eTable 6.** Baseline Characteristics of Pregnancies With Missing Outcome Data at Age Eight in MoBa

**eTable 7.** Baseline Characteristics of Pregnancies With Missing Outcome Data at Age Eight in ALSPAC

**eTable 8.** Descriptive Statistics for Additional Sociodemographic Characteristics Used in Sensitivity Analyses

**eTable 9.** Number and Proportion of Children Across Each Outcome in MoBa

**eFigure 2.** Covariate Balance Plot for Adherence to a Healthy Prenatal Dietary Pattern in ALSPAC

**eFigure 3.** Covariate Balance Plot for Adherence to a Healthy Prenatal Dietary Pattern in MoBa

**eTable 10.** Unadjusted Measures of Association Between a Healthy Prenatal Dietary Pattern and Autism Diagnosis and Autism-Associated Traits

**eTable 11.** Associations Between a Healthy Prenatal Dietary Pattern and Autism Diagnosis and Autism-Associated Traits in MoBa and ALSPAC With a Different Adjustment Set of Covariates

**eTable 12.** Associations Between a Healthy Prenatal Dietary Pattern and Food Groups With Autism Diagnosis and Autism-Associated Traits in ALSPAC and MoBa

**eTable 13.** Associations Between a Healthy Prenatal Dietary Pattern With Autism Diagnosis and Autism-Associated Traits in MoBa and ALSPAC Stratified by Prenatal Multivitamin Supplement Use, Prepregnancy BMI, Child Sex and Maternal Education

**eTable 14.** Complete Case Analyses Measuring the Associations Between Adherence to a Healthy Prenatal Dietary Pattern and Autism Diagnosis and Autism-Associated Traits in MoBa

### **eReferences.**

This supplemental material has been provided by the authors to give readers additional information about their work.

## eAppendix 1. Dietary patterns

Factor loadings are the correlation coefficients between the factor (HPDP) and food item which reflect the relative importance of foods within a HPDP, rather than quantity. The value of the factor loading is therefore sensitive to the number of items within the model and are not expected to be the exact same between MoBa and ALSPAC. Nonetheless, there are likely to be differences in the underlying diets between each cohort. In MoBa and ALSPAC, a HPDP loaded highly for fruits, vegetables, nuts, lean and oily fish, and low in fries and processed meats (eTable 1). However, high fibre bread loaded positively in MoBa but negatively in ALSPAC, and soft drinks loaded negatively in MoBa but were unimportant in ALSPAC.

We compared the factor loadings observed in MoBa and ALSPAC in the context of cultural trends in diet, around the time of pregnancy. The results were consistent with dietary trends observed in the respective countries' nationally representative diet and nutrition survey.<sup>1,2</sup> For example, between 1986-87 the UK population had especially low wholegrain intakes, at 2.5 serving per week, of which bread accounted for 48%.<sup>2</sup> Whereas, in 2002, 79% of Norwegian women consumed at least one to six serving of high fibre bread per week.

<sup>1</sup> The distribution of food intakes by quantity may be distinct for other items too. For instance, Norwegian women consumed an average of 0.3 serving of fish per day<sup>1</sup>, whereas British women consumed an average of 0.3 serving per week.<sup>3</sup>

**eTable 1. Food items and factor loadings representing a ‘healthy’ prenatal dietary pattern**

| <sup>a</sup> MoBa                   |                | <sup>a</sup> ALSPAC          |                |
|-------------------------------------|----------------|------------------------------|----------------|
| Food item                           | Factor loading | Food item                    | Factor loading |
| Dried fruit                         | 0.288          | Fruit                        | 0.51           |
| Berries                             | 0.192          |                              |                |
| Traditional fruits                  | 0.355          |                              |                |
| Cooked vegetables                   | 0.416          | Greens                       | 0.465          |
| Leafy greens                        | 0.356          | Leafy greens                 | 0.354          |
| Raw vegetables                      | 0.472          | Salad                        | 0.456          |
|                                     |                | Root vegetables              | 0.351          |
| Nuts                                | 0.191          | Nuts                         | 0.315          |
| High fiber cereals                  | 0.242          | High fiber cereal            | 0.367          |
| Wholemeal bread                     | 0.327          | <sup>c</sup> Wholemeal bread | -0.458         |
|                                     |                | <sup>c</sup> Granary bread   | -0.352         |
| <sup>b</sup> Other fish             | 0.189          |                              |                |
| Oily fish                           | 0.3            | Oily fish                    | 0.471          |
| Lean fish                           | 0.246          | Lean fish                    | 0.29           |
| Soft drinks (sugar sweetened)       | -0.394         | Soft drinks                  | 0.057          |
| Soft drinks (artificial sweeteners) | -0.402         |                              |                |
| Fries                               | -0.2           | Fries                        | -0.409         |
| White bread                         | -0.35          | White bread                  | 0.531          |
| Processed meat                      | -0.416         | Processed meat               | -0.279         |
| Meat (nonpoultry)                   | -0.228         | Meat (nonpoultry)            | -0.043         |

ALSPAC, Avon Longitudinal Study of Parents and Children; MoBa, The Norwegian Mother, Father, and Child Cohort Study. The food items selected have been matched across ALSPAC and MoBa where possible. <sup>a</sup>The proportion of variance explained by the factor is 10% in MoBa and 15% in ALSPAC. <sup>b</sup>Some categories were broken down to a greater extent in one dataset than the other, for example, fruit in MoBa had three broad categories but was one question in ALSPAC. <sup>b</sup>‘Other fish’ refers to fish in mixed dishes. To ensure the same food items were in each cohort we did not remove low factor loadings (<0.2). <sup>c</sup>In ALSPAC, negative factor loadings for wholemeal and granary bread could not be adjusted through rotation, and may reflect the low intakes in the general population of England around the early 1990s. <sup>2</sup>

**eTable 2. Food items and factor loadings of the subgroups of a ‘healthy’ prenatal dietary pattern**

| MoBa                                |                | ALSPAC            |                |
|-------------------------------------|----------------|-------------------|----------------|
| Food item                           | Factor loading | Food item         | Factor loading |
| <b>Plant-based dietary pattern</b>  |                |                   |                |
| Dried fruit                         | 0.277          | Fruit             | 0.427          |
| Berries                             | 0.263          |                   |                |
| Traditional fruits                  | 0.446          |                   |                |
| Cooked vegetables                   | 0.546          | Greens            | 0.678          |
| Leafy greens                        | 0.516          | Leafy greens      | 0.56           |
| Raw vegetables                      | 0.653          | Salad             | 0.402          |
|                                     |                | Root vegetables   | 0.467          |
| Nuts                                | 0.129          | Nuts              | 0.276          |
| High fiber cereals                  | 0.197          | High fiber cereal | 0.297          |
| Wholemeal bread                     | 0.149          | Wholemeal bread   | -0.318         |
|                                     |                | Granary bread     | -0.247         |
| <b>Fish-based dietary pattern</b>   |                |                   |                |
| Oily fish                           | 0.196          | Oily fish         | 0.626          |
| Lean fish                           | 0.679          | Lean fish         | 0.626          |
| <sup>a</sup> Other fish             | 0.362          |                   |                |
| <b>'Unhealthy' dietary pattern</b>  |                |                   |                |
| Soft drinks (sugar sweetened)       | 0.911          | Soft drinks       | -0.107         |
| Soft drinks (artificial sweeteners) | 0.885          |                   |                |
| Fries                               | 0.185          | Fries             | 0.59           |
| White bread                         | 0.167          | White bread       | -0.412         |
| Processed meat                      | 0.113          | Processed meat    | 0.531          |
| Meat (nonpoultry)                   | 0.073          | Meat (nonpoultry) | 0.264          |

ALSPAC, Avon Longitudinal Study of Parents and Children; MoBa, The Norwegian Mother, Father, and Child Cohort Study

<sup>a</sup>'Other fish' refers to fish in mixed dishes.

**eTable 3. Estimated nutrient intakes in ALSPAC and MoBa by level of adherence to a ‘healthy’ prenatal dietary pattern**

| Nutrient                               | MoBa (Median (interquartile range)) |                         |                         |                         | ALSPAC (Median (interquartile range)) |                         |                         |                         |
|----------------------------------------|-------------------------------------|-------------------------|-------------------------|-------------------------|---------------------------------------|-------------------------|-------------------------|-------------------------|
|                                        | Overall                             | Low                     | Medium                  | High                    | Overall                               | Low                     | Medium                  | High                    |
| <b>Total energy (kilocalories)</b>     | 2,229<br>(1,880, 2,653)             | 2,256<br>(1,891, 2,694) | 2,163<br>(1,825, 2,557) | 2,276<br>(1,930, 2,709) | 1,701<br>(1,404, 2,008)               | 1,694<br>(1,365, 2,029) | 1,694<br>(1,404, 2,003) | 1,712<br>(1,434, 1,997) |
| <b>Carbohydrate (g)</b>                | 295<br>(244, 358)                   | 297<br>(243, 365)       | 284<br>(235, 342)       | 305<br>(254, 367)       | 207<br>(171, 248)                     | 208<br>(166, 252)       | 205<br>(170, 247)       | 208<br>(175, 245)       |
| <b>Free sugars (g)</b>                 | 52<br>(36, 76)                      | 64<br>(42, 95)          | 49<br>(34, 69)          | 47<br>(33, 66)          | 53<br>(37, 75)                        | 60<br>(40, 89)          | 53<br>(37, 74)          | 48<br>(34, 64)          |
| <b>Fibre (g)</b>                       | 76<br>(63, 93)                      | 79<br>(65, 96)          | 74<br>(62, 91)          | 76<br>(62, 93)          | 69 (55, 85)                           | 71<br>(56, 88)          | 69<br>(56, 85)          | 68<br>(54, 82)          |
| <b>Total fat (g)</b>                   | 29<br>(24, 36)                      | 30<br>(25, 37)          | 28<br>(23, 35)          | 28<br>(23, 35)          | 28 (21, 36)                           | 30<br>(23, 39)          | 28<br>(22, 36)          | 26<br>(20, 33)          |
| <b>Saturated fat (g)</b>               | 24<br>(20, 30)                      | 25<br>(20, 30)          | 23<br>(19, 29)          | 24<br>(20, 31)          | 23 (18, 28)                           | 24<br>(18, 30)          | 23<br>(18, 28)          | 23<br>(18, 28)          |
| <b>Monounsaturated fatty acid (mg)</b> | 14<br>(11, 18)                      | 14<br>(11, 19)          | 13<br>(10, 17)          | 13<br>(10, 17)          | 11 (9, 15)                            | 10<br>(8, 14)           | 11<br>(9, 15)           | 12<br>(10, 16)          |
| <b>Polyunsaturated fatty acid (g)</b>  | 84<br>(72, 99)                      | 81<br>(69, 96)          | 83<br>(71, 96)          | 89<br>(76, 103)         | 68 (56, 81)                           | 62<br>(50, 74)          | 68<br>(56, 81)          | 74<br>(62, 87)          |
| <b>Protein (g)</b>                     | 2,044<br>(1,457, 3,237)             | 1,562<br>(1,177, 2,139) | 1,967<br>(1,474, 2,899) | 3,136<br>(2,056, 4,699) | 1,996<br>(1,655, 2,274)               | 1,804<br>(837, 2,020)   | 1,999<br>(1,773, 2,213) | 2,215<br>(1,973, 2,850) |
| <b>Beta carotene (µg)</b>              | 261<br>(209, 326)                   | 225<br>(181, 279)       | 252<br>(208, 307)       | 311<br>(256, 379)       | 238<br>(193, 287)                     | 202<br>(162, 244)       | 236<br>(197, 280)       | 277<br>(235, 323)       |
| <b>Folate (µg)</b>                     | 18<br>(16, 21)                      | 17<br>(15, 20)          | 18<br>(16, 21)          | 20<br>(17, 23)          | 15<br>(12, 19)                        | 13<br>(10, 16)          | 15<br>(12, 18)          | 17<br>(14, 21)          |
| <b>Niacin (mg)</b>                     | 1,108<br>(773, 1,586)               | 971<br>(684, 1,411)     | 1,059<br>(754, 1,504)   | 1,303<br>(930, 1,808)   | 626<br>(488, 845)                     | 573<br>(424, 745)       | 624<br>(495, 837)       | 685<br>(543, 984)       |
| <b>Retinol equivalents (µg)</b>        | 2,229<br>(1,880, 2,653)             | 2,256<br>(1,891, 2,694) | 2,163<br>(1,825, 2,557) | 2,276<br>(1,930, 2,709) | 1,701<br>(1,404, 2,008)               | 1,694<br>(1,365, 2,029) | 1,694<br>(1,404, 2,003) | 1,712<br>(1,434, 1,997) |
| <b>Riboflavin (mg)</b>                 | 295<br>(244, 358)                   | 297<br>(243, 365)       | 284<br>(235, 342)       | 305<br>(254, 367)       | 207<br>(171, 248)                     | 208<br>(166, 252)       | 205<br>(170, 247)       | 208<br>(175, 245)       |
| <b>Thiamin (mg)</b>                    | 1.5<br>(1.2, 1.8)                   | 1.4<br>(1.2, 1.7)       | 1.4<br>(1.2, 1.7)       | 1.6<br>(1.3, 1.9)       | 1.4<br>(1.1, 1.7)                     | 1.2<br>(1.0, 1.5)       | 1.4<br>(1.2, 1.7)       | 1.6<br>(1.3, 1.8)       |
| <b>Vitamin B6 (mg)</b>                 | 1.5<br>(1.2, 1.8)                   | 1.3<br>(1.1, 1.6)       | 1.4<br>(1.2, 1.7)       | 1.7<br>(1.5, 2.0)       | 1.9<br>(1.5, 2.2)                     | 1.7<br>(1.4, 2.0)       | 1.8<br>(1.5, 2.2)       | 2.0<br>(1.7, 2.4)       |
| <b>Vitamin B12 (µg)</b>                | 5.4<br>(4.1, 7.3)                   | 5.1<br>(3.8, 7.0)       | 5.3<br>(4.0, 7.1)       | 5.8<br>(4.4, 7.7)       | 4.3<br>(3.1, 6.2)                     | 3.6<br>(2.6, 4.8)       | 4.2<br>(3.1, 6.1)       | 5.6<br>(3.7, 7.1)       |

| Nutrient               | MoBa (Median (interquartile range)) |                         |                         |                         | ALSPAC (Median (interquartile range)) |                         |                         |                         |
|------------------------|-------------------------------------|-------------------------|-------------------------|-------------------------|---------------------------------------|-------------------------|-------------------------|-------------------------|
|                        | Overall                             | Low                     | Medium                  | High                    | Overall                               | Low                     | Medium                  | High                    |
| <b>Vitamin C (mg)</b>  | 146<br>(102, 206)                   | 121<br>(81, 176)        | 137<br>(99, 189)        | 181<br>(134, 243)       | 74<br>(53, 100)                       | 52<br>(39, 71)          | 74<br>(56, 95)          | 99<br>(77, 125)         |
| <b>Vitamin D (µg)</b>  | 3.2<br>(2.1, 4.4)                   | 3.0<br>(1.9, 4.1)       | 3.1<br>(2.1, 4.3)       | 3.5<br>(2.5, 4.8)       | 3.3<br>(2.3, 5.1)                     | 2.7<br>(1.9, 3.6)       | 3.3<br>(2.4, 4.7)       | 4.7<br>(3.1, 6.3)       |
| <b>Vitamin E (mg)</b>  | 10.0<br>(8.0, 12.8)                 | 9.4<br>(7.4, 12.2)      | 9.6<br>(7.7, 12.0)      | 11.1<br>(9.0, 14.1)     | 7.7<br>(5.5, 10.8)                    | 5.9<br>(4.3, 8.1)       | 7.9<br>(5.8, 10.8)      | 9.7<br>(7.2, 12.9)      |
| <b>Calcium (mg)</b>    | 977<br>(753, 1,263)                 | 936<br>(708, 1,234)     | 955<br>(738, 1,222)     | 1,039<br>(815, 1,322)   | 927<br>(745, 1,123)                   | 875<br>(689, 1,084)     | 925<br>(741, 1,120)     | 978<br>(803, 1,160)     |
| <b>Magnesium (mg)</b>  | 388<br>(321, 467)                   | 355<br>(294, 427)       | 378<br>(317, 449)       | 433<br>(364, 514)       | 241<br>(195, 293)                     | 203<br>(163, 244)       | 239<br>(199, 285)       | 283<br>(238, 333)       |
| <b>Phosphorus (µg)</b> | 1,640<br>(1,353, 1,984)             | 1,545<br>(1,270, 1,880) | 1,605<br>(1,334, 1,923) | 1,773<br>(1,484, 2,118) | 1,234<br>(1,011, 1,470)               | 1,098<br>(888, 1,323)   | 1,231<br>(1,024, 1,457) | 1,364<br>(1,159, 1,588) |
| <b>Potassium (mg)</b>  | 3,876<br>(3,225, 4,649)             | 3,515<br>(2,922, 4,218) | 3,759<br>(3,180, 4,457) | 4,370<br>(3,702, 5,155) | 2,848<br>(2,387, 3,327)               | 2,668<br>(2,196, 3,171) | 2,841<br>(2,395, 3,320) | 3,007<br>(2,594, 3,466) |
| <b>Selenium (µg)</b>   | 53<br>(44, 62)                      | 48<br>(40, 57)          | 52<br>(44, 61)          | 59<br>(50, 68)          | 67<br>(51, 85)                        | 56<br>(43, 71)          | 66<br>(52, 83)          | 80<br>(63, 101)         |
| <b>Sodium (mg)</b>     | 2,969<br>(2,516, 3,491)             | 2,985<br>(2,538, 3,505) | 2,923<br>(2,479, 3,422) | 3,004<br>(2,532, 3,546) | 2,165<br>(1,750, 2,601)               | 2,069<br>(1,632, 2,526) | 2,134<br>(1,748, 2,592) | 2,273<br>(1,874, 2,685) |
| <b>Zinc (mg)</b>       | 11.0<br>(9.2, 13.0)                 | 10.6<br>(8.9, 12.6)     | 10.8<br>(9.0, 12.7)     | 11.6<br>(9.7, 13.7)     | 8.0<br>(6.5, 9.7)                     | 7.1<br>(5.7, 8.7)       | 8.0<br>(6.6, 9.6)       | 8.9<br>(7.4, 10.4)      |

ALSPAC, Avon Longitudinal Study of Parents and Children; MoBa, Norwegian Mother, Father, and Child Cohort Study

In MoBa, daily nutrient intakes were estimated using FoodCalc <sup>4</sup> and the Norwegian food composition database and excluded alcohol and nutritional supplements <sup>5</sup>. In ALSPAC, daily nutrient intakes were estimated based on average portion sizes <sup>6</sup> using the McCance and Widdowson's 5<sup>th</sup> edition food composition tables and excluded alcohol and nutritional supplements <sup>7</sup>. Iodine intakes from diet were unavailable in our version of MoBa data, however further research from MoBa has confirmed iodine status is low as conformed by urinary iodine concentration and was unrelated to a healthy diet <sup>8</sup>

## **eAppendix 2. Explanation of DAG**

The aetiology of autism diagnosis and autism-associated traits is complex, and there are many potential confounders. We adjusted for a range of potential confounders most proximal to the mother, which likely have the strongest relation to maternal prenatal diet as well as autism diagnosis or autism-associated traits. However, to test this assumption we additionally adjusted for a range of paternal characteristics. Furthermore, children diagnosed with autism in later birthyears will be younger and may have more severe autism. If so, adjustment for birthyear could introduce bias and so we adjusted in the sensitivity analysis. This can help restrict the analyses to a minimum necessary adjustment set whilst providing an indication of the robustness of results to additional, albeit weaker, sources of potential confounding.

The DAG (eFigure 1) depicts potential confounders of the relationship between prenatal dietary pattern and autism diagnosis or autism-associated traits. Maternal age may cause maternal education, and both are potential causes of each downstream node (downstream to another variable), HPDP and autism diagnosis or autism-associated traits. Therefore, we adjusted for maternal education, maternal age, pre-pregnancy BMI, planned pregnancy, maternal depression, prenatal multivitamin use, prenatal alcohol intake, prenatal smoking, pre-pregnancy hypertension, and pre-pregnancy diabetes. The sensitivity analyses additionally adjusted for the following paternal characteristics; paternal education, paternal income (MoBa only), paternal BMI, paternal age, and birthyear. The ‘unmeasured/residual confounding’ recognises the limitations of our study design, in that we cannot be certain all potential confounders have been adjusted for.

**eFigure 1. Directed Acyclic Graph (DAG) of relationship between 'healthy' prenatal dietary pattern and autism related outcomes.**

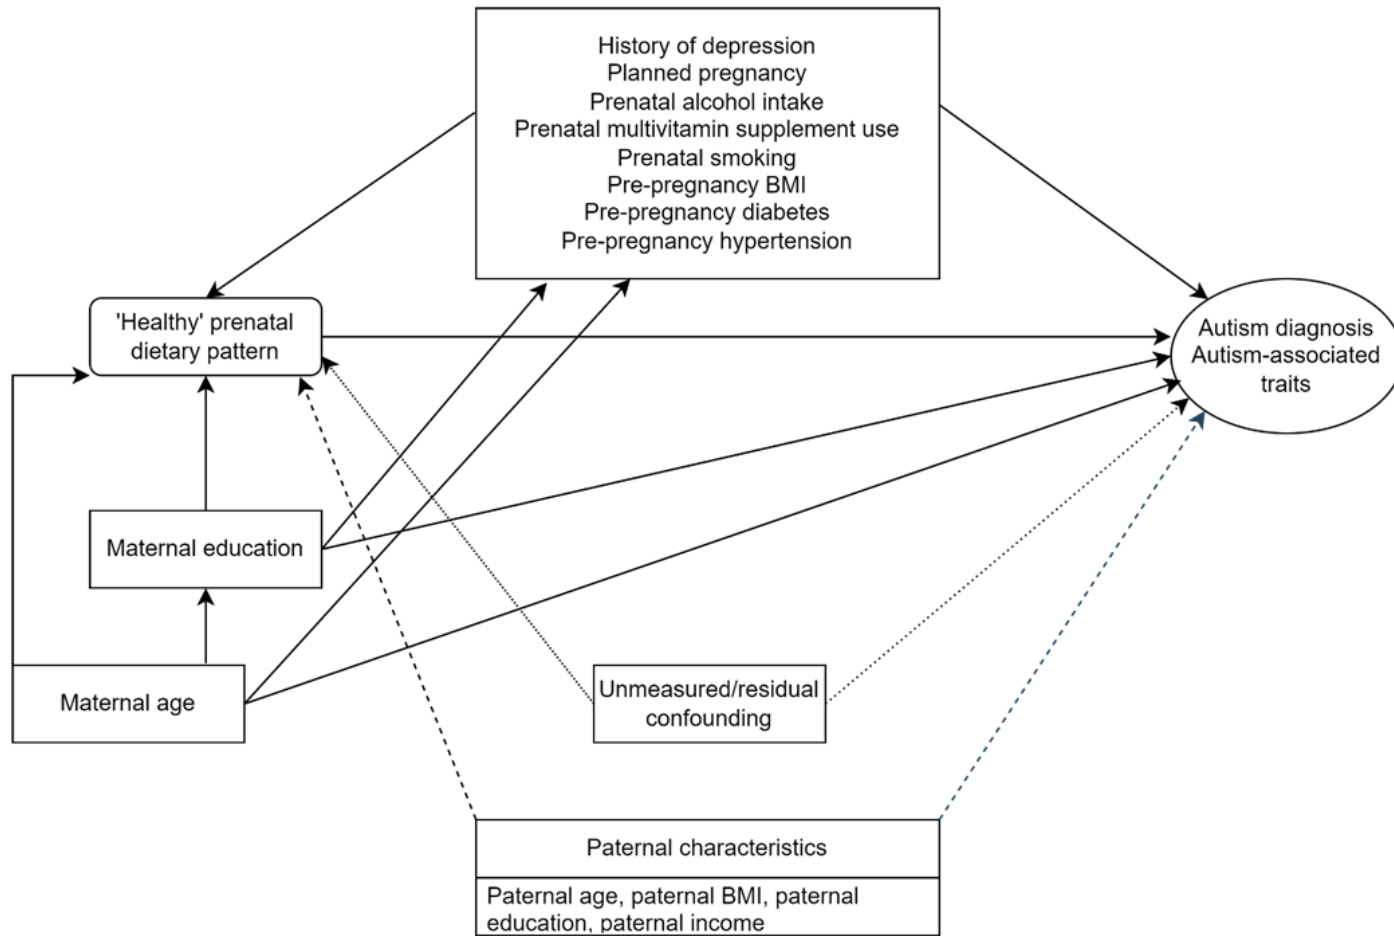

See text above, 'explanation of DAG. Solid line represents pathways between covariates included in the main analysis. Wide-dashed line indicates potential pathways with parental characteristics adjusted in sensitivity and close-dotted line indicates unmeasured and/or residual confounding.



### **eAppendix 3. Covariates**

The Medical Birth Registry is a national health registry containing information about all births in Norway and was used in the Norwegian Mother, Father, and Child Cohort (MoBa) to obtain information on child sex, maternal age, and paternal age. All other covariates were obtained from the self-completed questionnaires. Maternal covariates from MoBa were: highest level of maternal education (9-year secondary school/ 1–2-year high school/ technical high school/ 3-year high school general studies, junior college/ regional technical college, 4-year university degree (Bachelor’s degree, nurse, teacher, engineer)/ university, technical college more than 4 years (Master’s degree, medical doctor, PhD)), maternal age (years), pre-pregnancy BMI (kg/m<sup>2</sup>), pre-pregnancy depression (yes/no), history of anorexia nervosa, bulimia nervosa, or other eating disorder (yes/no) (referred to as eating disorder history (yes/no), history of anxiety (yes/no), planned pregnancy (yes/no), continuous use of multivitamin or folic acid supplement use from four weeks preconception to at least 12 weeks’ gestation (yes/no) (referred to as prenatal multivitamin use), alcohol intake (yes/no), pre-pregnancy diabetes (yes/no), maternal smoking (yes/no), pre-pregnancy hypertension (yes/no), parity (nulliparous, one, two, three, four, five or more), cohabitation with partner (yes/no). Paternal covariates are: paternal BMI (kg/m<sup>2</sup>), paternal age (years), paternal education (coded the same as maternal education), and paternal income (no income / under 150,000 Norwegian Krone (NOK) / 151,000-199,999 NOK / 200,000-299,999 NOK / 300,000-399,999 NOK / 400,000-499,999 NOK / over 500,000 NOK). Paternal covariates were all located from the maternal questionnaires as they were more complete.

Health records were used to obtain information on maternal diabetes, hypertension, and child sex. All other covariates were collected via self-completed questionnaires. Maternal covariates from ALSPAC were: maternal education (certificate of secondary education/none, vocational, ordinary level, advanced level, degree), maternal age (years), maternal pre-pregnancy BMI (kg/m<sup>2</sup>), history of depression (yes/no), history of anorexia nervosa (yes/no) (referred to as history of eating disorder), history of other mental illness (yes/no), planned pregnancy (yes/no), any multivitamin or folic acid supplement use up to 18-weeks’ gestation (yes/no), alcohol intake (yes/no), smoking (yes/no), pre-pregnancy diabetes (yes/no), and pre-pregnancy hypertension (yes/no), parity (nulliparous, one, two, three, four, five or more), anxiety or depression medication during pregnancy (yes/no), migraine medication (yes/no), sleep medication (yes/no). The paternal questionnaire was used to obtain paternal covariates on paternal age (years) and paternal BMI (kg/m<sup>2</sup>), which were only available from the paternal questionnaire, but paternal education (certificate of secondary education/none, vocational, ordinary level, advanced level, degree) was obtained from the maternal questionnaire.

#### **eAppendix 4. Sensitivity analyses**

We recalculated the SCQ-3 and SCQ-8 scores based on fully complete responses to the SCQ without adjustment for phased speech. All SCQ scores were analysed as binary outcomes with a cut-off at the  $\geq 93$ rd percentile to indicate a high level of autism-associated traits compared to a low level or no autism-associated traits. The overlap in children with high SCQ-3 score, high SCQ-8 score, and autism diagnosis are presented descriptively.

The precise composition of HPDP will vary across individuals and it is plausible that different facets of diet have a different association with the outcome. Therefore, we tested the consistency of our HPDP by deconstructing the HPDP into three food groups: plant-based, fish-based, and ‘unhealthy’. We repeated the main analyses but exchanged HPDP for each food group and used the same covariates. The factor analyses were repeated using the same procedures as the main analyses but with different food items taken from the HPDP (see eTable 2 for list of food items). The categories were plant-based (included all fruit and vegetables, nuts, and granary/high fibre/wholemeal cereals and bread items in factor analyses), fish-based (included all fish items in factor analyses), and ‘unhealthy’ (included soft drinks, fries, white bread, processed meat, meat (nonpoultry) items in factor analyses). However, discrete dietary subgroups can be weaker measures<sup>9</sup> and so the interpretation focused on marked differences in the overall trend to avoid over interpretation.

Interactions were measured on a multiplicative scale in logistic regression models adjusted for the same covariates as the main analyses, using the Wald-test extended to imputed data using the  $D_2$ -statistic<sup>10,11</sup>.

Interactions tested were between HPDP and: pre-pregnancy BMI ( $<25\text{kg/m}^2$  /  $\geq 25\text{kg/m}^2$ ), child’s sex (male / female), prenatal multivitamin supplement use (yes / no) and maternal education ( $<$ degree /  $\geq$  degree).

We aimed to adjust for the minimally sufficient adjustment set in the main analysis and maintain comparability in analytic approach between MoBa and ALSPAC. To test the robustness of covariate selection, we adjusted for additional covariates in sensitivity analysis. All additional models were adjusted for the same covariates set as the main models (unless stated otherwise) which were: child sex, history of depression, maternal age, maternal education, planned pregnancy, prenatal alcohol intake, prenatal multivitamin supplement use, prenatal smoking, pre-pregnancy BMI, pre-pregnancy diabetes, pre-pregnancy hypertension. A second set of models additionally adjusted for the following paternal characteristics: BMI ( $\text{kg/m}^2$ ) and age (years), education, and in MoBa only, paternal income, which was not available in ALSPAC during pregnancy. In a third set of models, we additionally adjusted for a range of covariates, most of which varied between MoBa and ALSPAC due to data availability. The additional covariates were: eating disorder history, parity, anxiety (MoBa only), cohabitation with partner (MoBa only), anxiety or depression medication (ALSPAC only), migraine medication (ALSPAC

only), sleep medication (ALSPAC only), other psychiatric history (ALSPAC only). Birthyear may represent cohort effects but can also reflect the child's age and so this was adjusted in a fourth set of models in sensitivity analysis. The fifth set of models repeated the adjustment set from the main analysis but omitted adjustment for prenatal multivitamin supplements.

Lastly, we repeated all main analysis based on complete cases in MoBa only, due to low counts in ALSPAC.

**eTable 4. Variables used in imputation models.**

| MoBa, variables                      | Method                   | ALSPAC, variables                        | Method                   |
|--------------------------------------|--------------------------|------------------------------------------|--------------------------|
| autism diagnosis                     | nil missing              | anxiety or depression medication         | logreg                   |
| anxiety                              | logreg                   | birthweight                              | Predictive mean matching |
| birthweight                          | Predictive mean matching | child sex                                | nil missing              |
| birthyear                            | polyreg                  | eating disorder history                  | logreg                   |
| child sex                            | logreg                   | gestational hypertension                 | logreg                   |
| cohabitation with partner            | logreg                   | healthy prenatal dietary pattern         | nil missing              |
| eating disorder history              | logreg                   | history of depression                    | logreg                   |
| healthy prenatal dietary pattern     | nil missing              | history of other mental illness          | logreg                   |
| history of depression                | logreg                   | hospitalisation before six years (child) | logreg                   |
| maternal age                         | nil missing              | household income (child age 4 years)     | polyreg                  |
| maternal education                   | polyreg                  | maternal age                             | Predictive mean matching |
| maternal income                      | polyreg                  | maternal education                       | polyreg                  |
| parity                               | polyreg                  | maternal social class                    | polyreg                  |
| paternal age                         | polyreg                  | migraine medication                      | logreg                   |
| paternal BMI                         | Predictive mean matching | parity                                   | polyreg                  |
| paternal education                   | polyreg                  | paternal age                             | polyreg                  |
| paternal income                      | polyreg                  | paternal BMI                             | Predictive mean matching |
| planned pregnancy                    | logreg                   | planned pregnancy                        | logreg                   |
| prenatal alcohol intake              | logreg                   | prenatal alcohol intake                  | logreg                   |
| prenatal multivitamin supplement use | logreg                   | prenatal multivitamin supplement use     | logreg                   |
| prenatal smoking                     | logreg                   | prenatal smoking                         | logreg                   |
| pre-pregnancy BMI                    | Predictive mean matching | pre-pregnancy BMI                        | Predictive mean matching |
| pre-pregnancy diabetes               | logreg                   | pre-pregnancy diabetes                   | logreg                   |
| pre-pregnancy hypertension           | logreg                   | pre-pregnancy hypertension               | logreg                   |
| SCQ-3                                | logreg                   | SCDC-8                                   | logreg                   |
| SCQ-8                                | logreg                   | severe vomiting                          | logreg                   |
| total energy intake                  | nil missing              | sleep medication                         | logreg                   |
|                                      |                          | total energy intake                      | nil missing              |
|                                      |                          | townsend deprivation                     | polyreg                  |

logreg, logistic regression, polyreg, Bayesian polytomous regression

ALSPAC, Avon Longitudinal Study of Parents and Children; BMI, body mass index; MoBa, The Norwegian Mother, Father, and Child Cohort Study; SCQ, social communication questionnaire; SCDC, social communication disorders checklist

**eTable 5. Baseline characteristics of pregnancies with missing outcome data at age three in MoBa.**

| Characteristic                                  | Level                                                                                              | Overall      | Adherence to a 'healthy' prenatal dietary pattern (n (%)) |               |               |
|-------------------------------------------------|----------------------------------------------------------------------------------------------------|--------------|-----------------------------------------------------------|---------------|---------------|
|                                                 |                                                                                                    |              | Low                                                       | Medium        | High          |
| Number of pregnancies                           |                                                                                                    | 32,986       | 11,287 (34.2)                                             | 10,801 (32.7) | 10,898 (33.0) |
| Child sex                                       | Male                                                                                               | 16975 (51.5) | 5888 (52.2)                                               | 5508 (51.0)   | 5579 (51.2)   |
|                                                 | Female                                                                                             | 15946 (48.3) | 5371 (47.6)                                               | 5271 (48.8)   | 5304 (48.7)   |
|                                                 | Missing                                                                                            | 65 (0.2)     | 28 (0.2)                                                  | 22 (0.2)      | 15 (0.1)      |
| History of depression                           | No                                                                                                 | 29210 (88.6) | 9913 (87.8)                                               | 9649 (89.3)   | 9648 (88.5)   |
|                                                 | Yes                                                                                                | 2790 (8.5)   | 1047 (9.3)                                                | 827 (7.7)     | 916 (8.4)     |
|                                                 | Missing                                                                                            | 986 (3.0)    | 327 (2.9)                                                 | 325 (3.0)     | 334 (3.1)     |
| Maternal age (years) (mean (SD))                |                                                                                                    | 29.9 (4.7)   | 28.8 (4.8)                                                | 30.1 (4.6)    | 31.0 (4.6)    |
|                                                 | Missing                                                                                            | 0            | 0                                                         | 0             | 0             |
| Maternal education                              | 9-year elementary                                                                                  | 1179 (3.6)   | 593 (5.3)                                                 | 325 (3.0)     | 261 (2.4)     |
|                                                 | 1-2 years further education                                                                        | 1954 (5.9)   | 985 (8.7)                                                 | 538 (5.0)     | 431 (4.0)     |
|                                                 | Technical high school                                                                              | 4650 (14.1)  | 2116 (18.7)                                               | 1473 (13.6)   | 1061 (9.7)    |
|                                                 | 3-year high school general studies, junior college                                                 | 4744 (14.4)  | 1917 (17.0)                                               | 1460 (13.5)   | 1367 (12.5)   |
|                                                 | Regional technical college, 4-year university degree (Bachelor's degree, nurse, teacher, engineer) | 11692 (35.4) | 3684 (32.6)                                               | 4075 (37.7)   | 3933 (36.1)   |
| Planned pregnancy                               | University, technical college, more than 4 years (Master's degree, medical doctor, PhD)            | 6461 (19.6)  | 1227 (10.9)                                               | 2204 (20.4)   | 3030 (27.8)   |
|                                                 | Missing                                                                                            | 2306 (7.0)   | 765 (6.8)                                                 | 726 (6.7)     | 815 (7.5)     |
|                                                 | No                                                                                                 | 6983 (21.2)  | 2638 (23.4)                                               | 2109 (19.5)   | 2236 (20.5)   |
| Prenatal alcohol intake                         | Yes                                                                                                | 25122 (76.2) | 8375 (74.2)                                               | 8429 (78.0)   | 8318 (76.3)   |
|                                                 | Missing                                                                                            | 881 (2.7)    | 274 (2.4)                                                 | 263 (2.4)     | 344 (3.2)     |
|                                                 | No                                                                                                 | 24468 (74.2) | 8617 (76.3)                                               | 8043 (74.5)   | 7808 (71.6)   |
| Prenatal multivitamin supplement use            | Yes                                                                                                | 3215 (9.7)   | 977 (8.7)                                                 | 1078 (10.0)   | 1160 (10.6)   |
|                                                 | Missing                                                                                            | 5303 (16.1)  | 1693 (15.0)                                               | 1680 (15.6)   | 1930 (17.7)   |
|                                                 | No                                                                                                 | 22747 (69.0) | 8388 (74.3)                                               | 7329 (67.9)   | 7030 (64.5)   |
| Prenatal smoking                                | Yes                                                                                                | 8055 (24.4)  | 2149 (19.0)                                               | 2776 (25.7)   | 3130 (28.7)   |
|                                                 | Missing                                                                                            | 2184 (6.6)   | 750 (6.6)                                                 | 696 (6.4)     | 738 (6.8)     |
|                                                 | No                                                                                                 | 26987 (81.8) | 8573 (76.0)                                               | 8942 (82.8)   | 9472 (86.9)   |
| Pre-pregnancy BMI kg/m <sup>2</sup> (mean (SD)) | Yes                                                                                                | 3089 (9.4)   | 1671 (14.8)                                               | 864 (8.0)     | 554 (5.1)     |
|                                                 | Missing                                                                                            | 2910 (8.8)   | 1043 (9.2)                                                | 995 (9.2)     | 872 (8.0)     |
|                                                 | No                                                                                                 | 24.2 (4.5)   | 24.7 (4.8)                                                | 24.3 (4.4)    | 23.7 (4.2)    |
|                                                 | Missing                                                                                            | 1504 (4.6)   | 501 (4.4)                                                 | 497 (4.6)     | 506 (4.6)     |

| Characteristic             | Level   | Overall      | Adherence to a 'healthy' prenatal dietary pattern (n (%)) |              |              |
|----------------------------|---------|--------------|-----------------------------------------------------------|--------------|--------------|
|                            |         |              | Low                                                       | Medium       | High         |
| Pre-pregnancy diabetes     | No      | 31833 (96.5) | 10919 (96.7)                                              | 10414 (96.4) | 10500 (96.3) |
|                            | Yes     | 167 (0.5)    | 41 (0.4)                                                  | 62 (0.6)     | 64 (0.6)     |
|                            | Missing | 986 (3.0)    | 327 (2.9)                                                 | 325 (3.0)    | 334 (3.1)    |
| Pre-pregnancy hypertension | No      | 31805 (96.4) | 10908 (96.6)                                              | 10440 (96.7) | 10457 (96.0) |
|                            | Yes     | 356 (1.1)    | 125 (1.1)                                                 | 112 (1.0)    | 119 (1.1)    |
|                            | Missing | 825 (2.5)    | 254 (2.3)                                                 | 249 (2.3)    | 322 (3.0)    |
| Autism diagnosis           | No      | 32608 (98.9) | 11107 (98.4)                                              | 10705 (99.1) | 10796 (99.1) |
|                            | Yes     | 378 (1.1)    | 180 (1.6)                                                 | 96 (0.9)     | 102 (0.9)    |
|                            | Missing | 26482 (80.3) | 9224 (81.7)                                               | 8655 (80.1)  | 8603 (78.9)  |
| <sup>a</sup> SCQ-8         | No      | 5861 (17.8)  | 1832 (16.2)                                               | 1945 (18.0)  | 2084 (19.1)  |
|                            | Yes     | 643 (1.9)    | 231 (2.0)                                                 | 201 (1.9)    | 211 (1.9)    |
|                            | Missing | 26482 (80.3) | 9224 (81.7)                                               | 8655 (80.1)  | 8603 (78.9)  |
| <sup>a</sup> SCQ-8-RR      | No      | 5487 (16.6)  | 1734 (15.4)                                               | 1807 (16.7)  | 1946 (17.9)  |
|                            | Yes     | 1017 (3.1)   | 329 (2.9)                                                 | 339 (3.1)    | 349 (3.2)    |
|                            | Missing | 26482 (80.3) | 9224 (81.7)                                               | 8655 (80.1)  | 8603 (78.9)  |
| <sup>a</sup> SCQ-8-COM     | No      | 5950 (18.0)  | 1861 (16.5)                                               | 1971 (18.2)  | 2118 (19.4)  |
|                            | Yes     | 554 (1.7)    | 202 (1.8)                                                 | 175 (1.6)    | 177 (1.6)    |
|                            | Missing | 26482 (80.3) | 9224 (81.7)                                               | 8655 (80.1)  | 8603 (78.9)  |

BMI, body mass index; MoBa, Norwegian Mother, Father, and Child Cohort; SD, standard deviation; SCQ-RRB, restrictive and repetitive behaviours subdomain of SCQ; SCQ-SOC, communication skills subdomain of SCQ. The number following each outcome denotes the approximate age of the child in years when the measure was obtained. i.e. SCQ-SOC-8; social communication subdomain measured at age 8 years. <sup>a</sup>The presence of the outcome from each questionnaire was indicated by a high score.

**eTable 6. Baseline characteristics of pregnancies with missing outcome data at age eight in MoBa.**

| Characteristic                                  | Level                                                                                              | Overall      | Adherence to a 'healthy' prenatal dietary pattern (n (%)) |               |               |
|-------------------------------------------------|----------------------------------------------------------------------------------------------------|--------------|-----------------------------------------------------------|---------------|---------------|
|                                                 |                                                                                                    |              | Low                                                       | Medium        | High          |
| Number of pregnancies                           |                                                                                                    | 44,294       | 15,310 (34.6)                                             | 14,538 (32.8) | 14,446 (32.6) |
| Child sex                                       | Male                                                                                               | 22774 (51.4) | 7953 (51.9)                                               | 7426 (51.1)   | 7395 (51.2)   |
|                                                 | Female                                                                                             | 21455 (48.4) | 7329 (47.9)                                               | 7090 (48.8)   | 7036 (48.7)   |
|                                                 | Missing                                                                                            | 65 (0.1)     | 28 (0.2)                                                  | 22 (0.2)      | 15 (0.1)      |
| History of depression                           | No                                                                                                 | 39462 (89.1) | 13567 (88.6)                                              | 13022 (89.6)  | 12873 (89.1)  |
|                                                 | Yes                                                                                                | 3650 (8.2)   | 1349 (8.8)                                                | 1126 (7.7)    | 1175 (8.1)    |
|                                                 | Missing                                                                                            | 1182 (2.7)   | 394 (2.6)                                                 | 390 (2.7)     | 398 (2.8)     |
| Maternal age (years) (mean (SD))                |                                                                                                    | 29.9 (4.7)   | 28.7 (4.7)                                                | 30.0 (4.5)    | 30.9 (4.5)    |
|                                                 | Missing                                                                                            | 0            | 0                                                         | 0             | 0             |
| Maternal education                              | 9-year elementary                                                                                  | 1435 (3.2)   | 726 (4.7)                                                 | 380 (2.6)     | 329 (2.3)     |
|                                                 | 1-2 years further education                                                                        | 2494 (5.6)   | 1257 (8.2)                                                | 698 (4.8)     | 539 (3.7)     |
|                                                 | Technical high school                                                                              | 6234 (14.1)  | 2853 (18.6)                                               | 1986 (13.7)   | 1395 (9.7)    |
|                                                 | 3-year high school general studies, junior college                                                 | 6445 (14.6)  | 2667 (17.4)                                               | 2001 (13.8)   | 1777 (12.3)   |
|                                                 | Regional technical college, 4-year university degree (Bachelor's degree, nurse, teacher, engineer) | 15884 (35.9) | 5081 (33.2)                                               | 5554 (38.2)   | 5249 (36.3)   |
| Planned pregnancy                               | University, technical college, more than 4 years (Master's degree, medical doctor, PhD)            | 8927 (20.2)  | 1755 (11.5)                                               | 3026 (20.8)   | 4146 (28.7)   |
|                                                 | Missing                                                                                            | 2875 (6.5)   | 971 (6.3)                                                 | 893 (6.1)     | 1011 (7.0)    |
|                                                 | No                                                                                                 | 8885 (20.1)  | 3355 (21.9)                                               | 2694 (18.5)   | 2836 (19.6)   |
| Prenatal alcohol intake                         | Yes                                                                                                | 34370 (77.6) | 11623 (75.9)                                              | 11542 (79.4)  | 11205 (77.6)  |
|                                                 | Missing                                                                                            | 1039 (2.3)   | 332 (2.2)                                                 | 302 (2.1)     | 405 (2.8)     |
|                                                 | No                                                                                                 | 33232 (75.0) | 11791 (77.0)                                              | 11001 (75.7)  | 10440 (72.3)  |
| Prenatal multivitamin supplement use            | Yes                                                                                                | 4228 (9.5)   | 1279 (8.4)                                                | 1419 (9.8)    | 1530 (10.6)   |
|                                                 | Missing                                                                                            | 6834 (15.4)  | 2240 (14.6)                                               | 2118 (14.6)   | 2476 (17.1)   |
|                                                 | No                                                                                                 | 30243 (68.3) | 11360 (74.2)                                              | 9720 (66.9)   | 9163 (63.4)   |
| Prenatal smoking                                | Yes                                                                                                | 11383 (25.7) | 3056 (20.0)                                               | 3968 (27.3)   | 4359 (30.2)   |
|                                                 | Missing                                                                                            | 2668 (6.0)   | 894 (5.8)                                                 | 850 (5.8)     | 924 (6.4)     |
|                                                 | No                                                                                                 | 36318 (82.0) | 11660 (76.2)                                              | 12084 (83.1)  | 12574 (87.0)  |
| Pre-pregnancy BMI kg/m <sup>2</sup> (mean (SD)) | Yes                                                                                                | 4026 (9.1)   | 2189 (14.3)                                               | 1131 (7.8)    | 706 (4.9)     |
|                                                 | Missing                                                                                            | 3950 (8.9)   | 1461 (9.5)                                                | 1323 (9.1)    | 1166 (8.1)    |
|                                                 | No                                                                                                 | 24.2 (4.5)   | 24.7 (4.7)                                                | 24.3 (4.4)    | 23.7 (4.2)    |
|                                                 | Missing                                                                                            | 1828 (4.1)   | 628 (4.1)                                                 | 579 (4.0)     | 621 (4.3)     |

| Characteristic             | Level   | Overall      | Adherence to a 'healthy' prenatal dietary pattern (n (%)) |              |              |
|----------------------------|---------|--------------|-----------------------------------------------------------|--------------|--------------|
|                            |         |              | Low                                                       | Medium       | High         |
| Pre-pregnancy diabetes     | No      | 42900 (96.9) | 14857 (97.0)                                              | 14087 (96.9) | 13956 (96.6) |
|                            | Yes     | 212 (0.5)    | 59 (0.4)                                                  | 61 (0.4)     | 92 (0.6)     |
|                            | Missing | 1182 (2.7)   | 394 (2.6)                                                 | 390 (2.7)    | 398 (2.8)    |
| Pre-pregnancy hypertension | No      | 42857 (96.8) | 14843 (96.9)                                              | 14088 (96.9) | 13926 (96.4) |
|                            | Yes     | 465 (1.0)    | 159 (1.0)                                                 | 162 (1.1)    | 144 (1.0)    |
|                            | Missing | 972 (2.2)    | 308 (2.0)                                                 | 288 (2.0)    | 376 (2.6)    |
| Autism diagnosis           | No      | 43745 (98.8) | 15061 (98.4)                                              | 14387 (99.0) | 14297 (99.0) |
|                            | Yes     | 549 (1.2)    | 249 (1.6)                                                 | 151 (1.0)    | 149 (1.0)    |
| <sup>a</sup> SCQ-3         | No      | 15754 (35.6) | 5337 (34.9)                                               | 5254 (36.1)  | 5163 (35.7)  |
|                            | Yes     | 2058 (4.6)   | 749 (4.9)                                                 | 629 (4.3)    | 680 (4.7)    |
|                            | Missing | 26482 (59.8) | 9224 (60.2)                                               | 8655 (59.5)  | 8603 (59.6)  |
| <sup>a</sup> SCQ-3-RR      | No      | 16056 (36.2) | 5518 (36.0)                                               | 5333 (36.7)  | 5205 (36.0)  |
|                            | Yes     | 1756 (4.0)   | 568 (3.7)                                                 | 550 (3.8)    | 638 (4.4)    |
|                            | Missing | 26482 (59.8) | 9224 (60.2)                                               | 8655 (59.5)  | 8603 (59.6)  |
| <sup>a</sup> SCQ-3-COM (%) | No      | 16070 (36.3) | 5376 (35.1)                                               | 5325 (36.6)  | 5369 (37.2)  |
|                            | Yes     | 1742 (3.9)   | 710 (4.6)                                                 | 558 (3.8)    | 474 (3.3)    |
|                            | Missing | 26482 (59.8) | 9224 (60.2)                                               | 8655 (59.5)  | 8603 (59.6)  |

BMI, body mass index; MoBa, Norwegian Mother, Father, and Child Cohort; SD, standard deviation; SCQ-RRB, restrictive and repetitive behaviours subdomain of SCQ; SCQ-SOC, communication skills subdomain of SCQ. The number following each outcome denotes the approximate age of the child in years when the measure was obtained. i.e. SCQ-SOC-8; social communication subdomain measured at age 8 years. <sup>a</sup>The presence of the outcome from each questionnaire was indicated by a high score.



**eTable 7. Baseline characteristics of pregnancies with missing outcome data at age eight in ALSPAC.**

| Characteristic                                  | Level                                   | Overall                    | Adherence to a 'healthy' prenatal dietary pattern (n (%)) |                            |                            |
|-------------------------------------------------|-----------------------------------------|----------------------------|-----------------------------------------------------------|----------------------------|----------------------------|
|                                                 |                                         |                            | Low                                                       | Medium                     | High                       |
| Number of pregnancies                           |                                         | 4,481                      | 1,845 (41.2)                                              | 1,486 (33.2)               | 1,150 (25.7)               |
| History of depression                           | No                                      | 3604 (80.4)                | 1414 (76.6)                                               | 1217 (81.9)                | 973 (84.6)                 |
|                                                 | Yes                                     | 444 (9.9)                  | 211 (11.4)                                                | 135 (9.1)                  | 98 (8.5)                   |
|                                                 | Missing                                 | 433 (9.7)                  | 220 (11.9)                                                | 134 (9.0)                  | 79 (6.9)                   |
| Maternal age (years) (mean (SD))                |                                         | 26.7 (5.1)                 | 25.06 (4.74)                                              | 26.96 (4.94)               | 28.81 (4.93)               |
|                                                 | Missing                                 | 68 (1.5)                   | 31 (1.7)                                                  | 21 (1.4)                   | 15 (1.3)                   |
| Maternal education                              | Certificate of secondary education/none | 1322 (29.5)                | 791 (42.9)                                                | 369 (24.8)                 | 162 (14.1)                 |
|                                                 | Vocational                              | 507 (11.3)                 | 241 (13.1)                                                | 179 (12.0)                 | 87 (7.6)                   |
|                                                 | Ordinary level                          | 1501 (33.5)                | 574 (31.1)                                                | 558 (37.6)                 | 369 (32.1)                 |
|                                                 | Advanced level                          | 767 (17.1)                 | 176 (9.5)                                                 | 279 (18.8)                 | 312 (27.1)                 |
|                                                 | Degree                                  | 338 (7.5)                  | 32 (1.7)                                                  | 91 (6.1)                   | 215 (18.7)                 |
| Planned pregnancy                               | Missing                                 | 46 (1.0)                   | 31 (1.7)                                                  | 10 (0.7)                   | 5 (0.4)                    |
|                                                 | No                                      | 2750 (61.4)                | 1067 (57.8)                                               | 927 (62.4)                 | 756 (65.7)                 |
|                                                 | Yes                                     | 1526 (34.1)                | 672 (36.4)                                                | 495 (33.3)                 | 359 (31.2)                 |
| Prenatal alcohol intake                         | Missing                                 | 205 (4.6)                  | 106 (5.7)                                                 | 64 (4.3)                   | 35 (3.0)                   |
|                                                 | No                                      | 1739 (38.8)                | 774 (42.0)                                                | 576 (38.8)                 | 389 (33.8)                 |
|                                                 | Yes                                     | 643 (14.3)                 | 211 (11.4)                                                | 216 (14.5)                 | 216 (18.8)                 |
| Prenatal multivitamin supplement use            | Missing                                 | 2099 (46.8)                | 860 (46.6)                                                | 694 (46.7)                 | 545 (47.4)                 |
|                                                 | No                                      | 3333 (74.4)                | 1431 (77.6)                                               | 1100 (74.0)                | 802 (69.7)                 |
|                                                 | Yes                                     | 915 (20.4)                 | 288 (15.6)                                                | 319 (21.5)                 | 308 (26.8)                 |
| Prenatal smoking                                | Missing                                 | 233 (5.2)                  | 126 (6.8)                                                 | 67 (4.5)                   | 40 (3.5)                   |
|                                                 | No                                      | 2934 (65.5)                | 1002 (54.3)                                               | 1019 (68.6)                | 913 (79.4)                 |
|                                                 | Yes                                     | 1373 (30.6)                | 747 (40.5)                                                | 416 (28.0)                 | 210 (18.3)                 |
| Pre-pregnancy BMI kg/m <sup>2</sup> (mean (SD)) | Missing                                 | 174 (3.9)                  | 96 (5.2)                                                  | 51 (3.4)                   | 27 (2.3)                   |
|                                                 |                                         | 23.1 (4.1)                 | 23.3 (4.49)                                               | 23.3 (4.01)                | 22.5 (3.42)                |
|                                                 | Missing                                 | 549 (1.2)                  | 204 (1.1)                                                 | 190 (1.3)                  | 155 (1.4)                  |
| Pre-pregnancy diabetes                          | Yes                                     | Not disclosed <sup>a</sup> | ≤ 10 <sup>a</sup>                                         | ≤ 10 <sup>a</sup>          | ≤ 10 <sup>a</sup>          |
|                                                 | No                                      | 3839 (85.7)                | 1516 (82.2)                                               | 1297 (87.3)                | 1026 (89.2)                |
|                                                 | Missing                                 | Not disclosed <sup>a</sup> | Not disclosed <sup>a</sup>                                | Not disclosed <sup>a</sup> | Not disclosed <sup>a</sup> |
| Pre-pregnancy hypertension                      | No                                      | 4438 (99.0)                | 1823 (98.8)                                               | 1474 (99.2)                | 1141 (99.2)                |
|                                                 | Yes                                     | ≤ 10 <sup>a</sup>          | ≤ 10 <sup>a</sup>                                         | ≤ 10 <sup>a</sup>          | ≤ 10 <sup>a</sup>          |
|                                                 | Missing                                 | Not disclosed <sup>a</sup> | Not disclosed <sup>a</sup>                                | Not disclosed <sup>a</sup> | Not disclosed <sup>a</sup> |

ALSPAC, Avon Longitudinal Study of Parents and Children; BMI, body mass index; SD, standard deviation. The number following each outcome denotes the approximate age of the child in years when the measure was obtained.<sup>a</sup>Exact values have been removed as low counts are potentially disclosive.

**eTable 8. Descriptive statistics for additional sociodemographic characteristics used in sensitivity analyses**

| MoBa (n (%))                                    |                       |              |              |              |              |
|-------------------------------------------------|-----------------------|--------------|--------------|--------------|--------------|
| Characteristic                                  |                       | Overall      | Low          | Medium       | High         |
|                                                 | Number of pregnancies | 84,548       | 28,183       | 28,182       | 28,183       |
| Interactions                                    |                       |              |              |              |              |
| Child sex                                       | Male                  | 43277 (51.2) | 14465 (51.3) | 14443 (51.2) | 14369 (51.0) |
|                                                 | Female                | 41206 (48.7) | 13690 (48.6) | 13717 (48.7) | 13799 (49.0) |
|                                                 | Missing               | 65 (0.1)     | 28 (0.1)     | 22 (0.1)     | 15 (0.1)     |
| Maternal education category                     | No                    | 52509 (62.1) | 14439 (51.2) | 18248 (64.8) | 19822 (70.3) |
|                                                 | Yes                   | 27216 (32.2) | 12127 (43.0) | 8412 (29.8)  | 6677 (23.7)  |
|                                                 | Missing               | 4823 (5.7)   | 1617 (5.7)   | 1522 (5.4)   | 1684 (6.0)   |
| Pre-pregnancy BMI category<br>kg/m <sup>2</sup> | <25                   | 56032 (66.3) | 17430 (61.8) | 18511 (65.7) | 20091 (71.3) |
|                                                 | ≥ 25                  | 25708 (30.4) | 9818 (34.8)  | 8769 (31.1)  | 7121 (25.3)  |
|                                                 | Missing               | 2808 (3.3)   | 935 (3.3)    | 902 (3.2)    | 971 (3.4)    |
| Prenatal multivitamin supplement<br>use         | No                    | 55706 (65.9) | 20282 (72.0) | 18268 (64.8) | 17156 (60.9) |
|                                                 | Yes                   | 24632 (29.1) | 6506 (23.1)  | 8551 (30.3)  | 9575 (34.0)  |
|                                                 | Missing               | 4210 (5.0)   | 1395 (4.9)   | 1363 (4.8)   | 1452 (5.2)   |
| Additional adjustment for Birthyear             |                       |              |              |              |              |
|                                                 | 2002                  | 4364 (5.2)   | 2017 (7.2)   | 1377 (4.9)   | 970 (3.4)    |
|                                                 | 2003                  | 11463 (13.6) | 4934 (17.5)  | 3614 (12.8)  | 2915 (10.3)  |
|                                                 | 2004                  | 12127 (14.3) | 4914 (17.4)  | 3934 (14.0)  | 3279 (11.6)  |
|                                                 | 2005                  | 13264 (15.7) | 4757 (16.9)  | 4405 (15.6)  | 4102 (14.6)  |
|                                                 | 2006                  | 15116 (17.9) | 4591 (16.3)  | 5203 (18.5)  | 5322 (18.9)  |
|                                                 | 2007                  | 13753 (16.3) | 3608 (12.8)  | 4800 (17.0)  | 5345 (19.0)  |
|                                                 | 2008                  | 11454 (13.5) | 2758 (9.8)   | 3889 (13.8)  | 4807 (17.1)  |
|                                                 | 2009                  | 2848 (3.4)   | 555 (2.0)    | 922 (3.3)    | 1371 (4.9)   |
|                                                 | Missing               | 159 (0.2)    | 49 (0.2)     | 38 (0.1)     | 72 (0.3)     |
| Additional covariates for adjustment            |                       |              |              |              |              |
| Cohabitation with partner                       | No                    | 3247 (3.8)   | 1205 (4.3)   | 959 (3.4)    | 1083 (3.8)   |
|                                                 | Yes                   | 79567 (94.1) | 26388 (93.6) | 26666 (94.6) | 26513 (94.1) |
|                                                 | Missing               | 1734 (2.1)   | 590 (2.1)    | 557 (2.0)    | 587 (2.1)    |
| Eating disorder history                         | No                    | 80275 (94.9) | 26969 (95.7) | 26872 (95.4) | 26434 (93.8) |
|                                                 | Yes                   | 2539 (3.0)   | 624 (2.2)    | 753 (2.7)    | 1162 (4.1)   |
|                                                 | Missing               | 1734 (2.1)   | 590 (2.1)    | 557 (2.0)    | 587 (2.1)    |
| History of anxiety                              | No                    | 79874 (94.5) | 26542 (94.2) | 26720 (94.8) | 26612 (94.4) |
|                                                 | Yes                   | 2940 (3.5)   | 1051 (3.7)   | 905 (3.2)    | 984 (3.5)    |

| <b>MoBa (n (%))</b>                                |                                                                                                    |                |              |               |              |
|----------------------------------------------------|----------------------------------------------------------------------------------------------------|----------------|--------------|---------------|--------------|
| <b>Characteristic</b>                              |                                                                                                    | <b>Overall</b> | <b>Low</b>   | <b>Medium</b> | <b>High</b>  |
| History of anxiety                                 | Missing                                                                                            | 1734 (2.1)     | 590 (2.1)    | 557 (2.0)     | 587 (2.1)    |
| Parity                                             | Zero (primiparous)                                                                                 | 38462 (45.5)   | 12827 (45.5) | 12718 (45.1)  | 12917 (45.8) |
|                                                    | One                                                                                                | 29876 (35.3)   | 10212 (36.2) | 10125 (35.9)  | 9539 (33.8)  |
|                                                    | Two                                                                                                | 12571 (14.9)   | 3996 (14.2)  | 4177 (14.8)   | 4398 (15.6)  |
|                                                    | Three                                                                                              | 2652 (3.1)     | 831 (2.9)    | 864 (3.1)     | 957 (3.4)    |
|                                                    | Four or more                                                                                       | 828 (1.0)      | 268 (1.0)    | 260 (0.9)     | 300 (1.1)    |
|                                                    | Missing                                                                                            | 159 (0.2)      | 49 (0.2)     | 38 (0.1)      | 72 (0.3)     |
| Additional adjustment for paternal characteristics |                                                                                                    |                |              |               |              |
| Paternal age                                       | <25 years                                                                                          | 3803 (4.5)     | 2003 (7.1)   | 1069 (3.8)    | 731 (2.6)    |
|                                                    | 25-34 years                                                                                        | 51800 (61.3)   | 18354 (65.1) | 17456 (61.9)  | 15990 (56.7) |
|                                                    | 35-44 years                                                                                        | 26291 (31.1)   | 7241 (25.7)  | 8861 (31.4)   | 10189 (36.2) |
|                                                    | 45-54 years                                                                                        | 2063 (2.4)     | 427 (1.5)    | 636 (2.3)     | 1000 (3.5)   |
|                                                    | ≥ 55 years                                                                                         | 164 (0.2)      | 29 (0.1)     | 35 (0.1)      | 100 (0.4)    |
|                                                    | Missing                                                                                            | 427 (0.5)      | 129 (0.5)    | 125 (0.4)     | 173 (0.6)    |
| Paternal BMI kg/m <sup>2</sup> (mean (SD))         |                                                                                                    | 25.8 (3.3)     | 26.1 (3.5)   | 25.9 (3.3)    | 25.5 (3.1)   |
|                                                    | Missing                                                                                            | 4289 (5.1)     | 1400 (5.0)   | 1367 (4.9)    | 1522 (5.4)   |
| Paternal income                                    | No income                                                                                          | 712 (0.8)      | 245 (0.9)    | 235 (0.8)     | 232 (0.8)    |
|                                                    | Less than 150,000 NOK                                                                              | 4302 (5.1)     | 1563 (5.5)   | 1310 (4.6)    | 1429 (5.1)   |
|                                                    | 150-199,999 NOK                                                                                    | 3243 (3.8)     | 1283 (4.6)   | 993 (3.5)     | 967 (3.4)    |
|                                                    | 200-299,999 NOK                                                                                    | 16862 (19.9)   | 6939 (24.6)  | 5414 (19.2)   | 4509 (16.0)  |
|                                                    | 300-399,999 NOK                                                                                    | 26214 (31.0)   | 9084 (32.2)  | 8890 (31.5)   | 8240 (29.2)  |
|                                                    | 400-499,999 NOK                                                                                    | 13593 (16.1)   | 3751 (13.3)  | 4831 (17.1)   | 5011 (17.8)  |
|                                                    | over 500,000 NOK                                                                                   | 13346 (15.8)   | 3022 (10.7)  | 4554 (16.2)   | 5770 (20.5)  |
|                                                    | Missing                                                                                            | 6276 (7.4)     | 2296 (8.1)   | 1955 (6.9)    | 2025 (7.2)   |
| Paternal education                                 | 9-year elementary                                                                                  | 3575 (4.2)     | 1640 (5.8)   | 1086 (3.9)    | 849 (3.0)    |
|                                                    | 1-2 years further education                                                                        | 4430 (5.2)     | 2096 (7.4)   | 1336 (4.7)    | 998 (3.5)    |
|                                                    | Technical high school                                                                              | 19673 (23.3)   | 8300 (29.5)  | 6417 (22.8)   | 4956 (17.6)  |
|                                                    | 3-year high school general studies, junior college                                                 | 9337 (11.0)    | 3505 (12.4)  | 3116 (11.1)   | 2716 (9.6)   |
|                                                    | Regional technical college, 4-year university degree (Bachelor's degree, nurse, teacher, engineer) | 21106 (25.0)   | 6172 (21.9)  | 7378 (26.2)   | 7556 (26.8)  |
|                                                    | University, technical college, more than 4 years (Master's degree, medical doctor, PhD)            | 18376 (21.7)   | 3785 (13.4)  | 6263 (22.2)   | 8328 (29.5)  |
|                                                    | Missing                                                                                            | 8051 (9.5)     | 2685 (9.5)   | 2586 (9.2)    | 2780 (9.9)   |
|                                                    | Number of pregnancies                                                                              | 11,760         | 3920         | 3920          | 3920         |
|                                                    |                                                                                                    |                |              |               |              |

| ALSPAC (n (%))                               |                    |              |             |             |             |
|----------------------------------------------|--------------------|--------------|-------------|-------------|-------------|
| Characteristic                               |                    | Overall      | Low         | Medium      | High        |
| Interactions                                 |                    |              |             |             |             |
| Child sex                                    | Male               | 6034 (51.3)  | 2017 (51.5) | 1998 (51.0) | 2019 (51.5) |
|                                              | Female             | 5725 (48.7)  | 1902 (48.5) | 1922 (49.0) | 1901 (48.5) |
|                                              | Missing            | 1 (0.0)      | 1 (0.0)     | 0 (0.0)     | 0 (0.0)     |
| Maternal education category                  | High               | 4148 (35.3)  | 617 (15.7)  | 1264 (32.2) | 2267 (57.8) |
|                                              | Low                | 7542 (64.1)  | 3265 (83.3) | 2636 (67.2) | 1641 (41.9) |
|                                              | Missing            | 70 (0.6)     | 38 (1.0)    | 20 (0.5)    | 12 (0.3)    |
| Pre-pregnancy BMI category kg/m <sup>2</sup> | <25                | 8275 (70.4)  | 2501 (63.8) | 2693 (68.7) | 3081 (78.6) |
|                                              | ≥ 25               | 2142 (18.2)  | 835 (21.3)  | 777 (19.8)  | 530 (13.5)  |
|                                              | Missing            | 1343 (11.4)  | 584 (14.9)  | 450 (11.5)  | 309 (7.9)   |
| Prenatal multivitamin supplement use         | No                 | 8877 (75.5)  | 3067 (78.2) | 3009 (76.8) | 2801 (71.5) |
|                                              | Yes                | 2568 (21.8)  | 683 (17.4)  | 823 (21.0)  | 1062 (27.1) |
|                                              | Missing            | 315 (2.7)    | 170 (4.3)   | 88 (2.2)    | 57 (1.5)    |
| Additional covariates for adjustment         |                    |              |             |             |             |
| Anxiety or depression medication             | No                 | 11495 (97.7) | 3791 (96.7) | 3848 (98.2) | 3856 (98.4) |
|                                              | Yes                | 153 (1.3)    | 75 (1.9)    | 31 (0.8)    | 47 (1.2)    |
|                                              | Missing            | 112 (1.0)    | 54 (1.4)    | 41 (1.0)    | 17 (0.4)    |
| Eating disorder history                      | No                 | 10995 (93.5) | 3607 (92.0) | 3697 (94.3) | 3691 (94.2) |
|                                              | Yes                | 224 (1.9)    | 45 (1.1)    | 55 (1.4)    | 124 (3.2)   |
|                                              | Missing            | 541 (4.6)    | 268 (6.8)   | 168 (4.3)   | 105 (2.7)   |
| History of other mental illness              | No                 | 10968 (93.3) | 3581 (91.4) | 3662 (93.4) | 3725 (95.0) |
|                                              | Yes                | 251 (2.1)    | 71 (1.8)    | 90 (2.3)    | 90 (2.3)    |
|                                              | Missing            | 541 (4.6)    | 268 (6.8)   | 168 (4.3)   | 105 (2.7)   |
| Migraine medication                          | No                 | 10707 (91.0) | 3494 (89.1) | 3554 (90.7) | 3659 (93.3) |
|                                              | Yes                | 941 (8.0)    | 372 (9.5)   | 325 (8.3)   | 244 (6.2)   |
|                                              | Missing            | 112 (1.0)    | 54 (1.4)    | 41 (1.0)    | 17 (0.4)    |
| Parity                                       | Zero (nulliparous) | 5111 (43.5)  | 1541 (39.3) | 1690 (43.1) | 1880 (48.0) |
|                                              | One                | 4006 (34.1)  | 1375 (35.1) | 1333 (34.0) | 1298 (33.1) |
|                                              | Two                | 1601 (13.6)  | 555 (14.2)  | 551 (14.1)  | 495 (12.6)  |
|                                              | Three or more      | 450 (3.8)    | 167 (4.3)   | 167 (4.3)   | 116 (3.0)   |
|                                              | Missing            | 170 (1.4)    | 82 (2.1)    | 50 (1.3)    | 38 (1.0)    |
| Sleep medication                             | No                 | 11271 (95.8) | 3709 (94.6) | 3764 (96.0) | 3798 (96.9) |
|                                              | Yes                | 377 (3.2)    | 157 (4.0)   | 115 (2.9)   | 105 (2.7)   |
|                                              | Missing            | 112 (1.0)    | 54 (1.4)    | 41 (1.0)    | 17 (0.4)    |

| ALSPAC (n (%))                                     |                                         | ALSPAC (n (%)) | ALSPAC (n (%)) | ALSPAC (n (%)) | ALSPAC (n (%)) |
|----------------------------------------------------|-----------------------------------------|----------------|----------------|----------------|----------------|
| Characteristic                                     |                                         | Characteristic | Characteristic | Characteristic | Characteristic |
| Additional adjustment for paternal characteristics |                                         |                |                |                |                |
| Paternal age category                              | <25 years                               | 827 (7.0)      | 447 (11.4)     | 267 (6.8)      | 113 (2.9)      |
|                                                    | 25-29 years                             | 2526 (21.5)    | 934 (23.8)     | 872 (22.2)     | 720 (18.4)     |
|                                                    | 29-34 years                             | 2559 (21.8)    | 607 (15.5)     | 889 (22.7)     | 1063 (27.1)    |
|                                                    | 35-39 years                             | 1071 (9.1)     | 217 (5.5)      | 327 (8.3)      | 527 (13.4)     |
|                                                    | ≥ 40 years                              | 426 (3.6)      | 74 (1.9)       | 147 (3.8)      | 205 (5.2)      |
|                                                    | Missing                                 | 4351 (37.0)    | 1641 (41.9)    | 1418 (36.2)    | 1292 (33.0)    |
| Paternal BMI kg/m <sup>2</sup> (mean (SD))         |                                         | 25.2 (3.3)     | 25.4 (3.7)     | 25.2 (3.3)     | 24.9 (2.9)     |
|                                                    | Missing                                 | 4089 (34.8)    | 1576 (40.2)    | 1333 (34.0)    | 1180 (30.1)    |
| Paternal education                                 | Certificate of secondary education/none | 2884 (24.5)    | 1445 (36.9)    | 926 (23.6)     | 513 (13.1)     |
|                                                    | Vocational                              | 958 (8.1)      | 381 (9.7)      | 362 (9.2)      | 215 (5.5)      |
|                                                    | Ordinary level                          | 2389 (20.3)    | 824 (21.0)     | 874 (22.3)     | 691 (17.6)     |
|                                                    | Advanced level                          | 2970 (25.3)    | 822 (21.0)     | 1041 (26.6)    | 1107 (28.2)    |
|                                                    | Degree                                  | 2039 (17.3)    | 183 (4.7)      | 561 (14.3)     | 1295 (33.0)    |
|                                                    | Missing                                 | 520 (4.4)      | 265 (6.8)      | 156 (4.0)      | 99 (2.5)       |

ALSPAC, Avon Longitudinal Study of Parents and Children; BMI, body mass index; NOK, Norwegian Krone, MoBa, Norwegian Mother, Father, and Child Cohort; SD, standard deviation

**eTable 9. Number and proportion of children across each outcome in MoBa**

| Outcome                       |         | SCQ-3 (n (%)) |             | SCQ-8 (n (%)) |             | Autism diagnosis (n (%)) |            |
|-------------------------------|---------|---------------|-------------|---------------|-------------|--------------------------|------------|
|                               |         | No            | Yes         | No            | Yes         | No                       | Yes        |
| <b>Number of participants</b> |         | 46154         | 5408        | 36786         | 3468        | 83606                    | 942        |
| <b>Autism</b>                 | No      | 45789 (99.2)  | 5206 (96.3) | 36606 (99.5)  | 3253 (93.8) | NA                       | NA         |
|                               | Yes     | 365 (0.8)     | 199 (3.7)   | 180 (0.5)     | 213 (6.1)   | NA                       | NA         |
|                               | Missing | 0 (0.0)       | 3 (0.1)     | 0 (0.0)       | 2 (0.1)     | NA                       | NA         |
| <b><sup>a</sup>SCQ-8</b>      | No      | 28284 (61.3)  | 2641 (48.8) | NA            | NA          | 36606 (43.8)             | 180 (19.1) |
|                               | Yes     | 2116 (4.6)    | 709 (13.1)  | NA            | NA          | 3253 (3.9)               | 213 (22.6) |
|                               | Missing | 15754 (34.1)  | 2058 (38.1) | NA            | NA          | 43739 (52.3)             | 549 (58.3) |
| <b><sup>a</sup>SCQ-RRB-8</b>  | No      | 26641 (57.7)  | 2109 (39.0) | 32288 (87.8)  | 1949 (56.2) | 34104 (40.8)             | 133 (14.1) |
|                               | Yes     | 3759 (8.1)    | 1241 (22.9) | 4498 (12.2)   | 1519 (43.8) | 5755 (6.9)               | 260 (27.6) |
|                               | Missing | 15754 (34.1)  | 2058 (38.1) | 0 (0.0)       | 0 (0.0)     | 43739 (52.3)             | 549 (58.3) |
| <b><sup>a</sup>SCQ-SOC-8</b>  | No      | 28390 (61.5)  | 2878 (53.2) | 36179 (98.3)  | 1039 (30.0) | 36964 (44.2)             | 254 (27.0) |
|                               | Yes     | 2010 (4.4)    | 472 (8.7)   | 607 (1.7)     | 2429 (70.0) | 2895 (3.5)               | 139 (14.8) |
|                               | Missing | 15754 (34.1)  | 2058 (38.1) | 0 (0.0)       | 0 (0.0)     | 43739 (52.3)             | 549 (58.3) |
| <b><sup>a</sup>SCQ-3</b>      | No      | NA            | NA          | 28284 (76.9)  | 2116 (61.0) | 45789 (54.8)             | 365 (38.7) |
|                               | Yes     | NA            | NA          | 2641 (7.2)    | 709 (20.4)  | 5206 (6.2)               | 199 (21.1) |
|                               | Missing | NA            | NA          | 5861 (15.9)   | 643 (18.5)  | 32603 (39.0)             | 378 (40.1) |
| <b><sup>a</sup>SCQ-RRB-3</b>  | No      | 44876 (97.2)  | 2202 (40.7) | 28583 (77.7)  | 2439 (70.3) | 46584 (55.7)             | 491 (52.1) |
|                               | Yes     | 1278 (2.8)    | 3206 (59.3) | 2342 (6.4)    | 386 (11.1)  | 4411 (5.3)               | 73 (7.7)   |
|                               | Missing | 0 (0.0)       | 0 (0.0)     | 5861 (15.9)   | 643 (18.5)  | 32603 (39.0)             | 378 (40.1) |
| <b><sup>a</sup>SCQ-SOC-3</b>  | No      | 43286 (93.8)  | 3195 (59.1) | 28385 (77.2)  | 2026 (58.4) | 46143 (55.2)             | 338 (35.9) |
|                               | Yes     | 2868 (6.2)    | 2213 (40.9) | 2540 (6.9)    | 799 (23.0)  | 4852 (5.8)               | 226 (24.0) |
|                               | Missing | 0 (0.0)       | 0 (0.0)     | 5861 (15.9)   | 643 (18.5)  | 32603 (39.0)             | 378 (40.1) |

Norwegian Mother, Father, and Child Cohort; NA, not applicable; n, number of mother-child dyads; SCQ-RRB, restrictive and repetitive behaviours subdomain of SCQ; SCQ-SOC, communication skills subdomain of SCQ. The number following each outcome denotes the approximate age of the child in years when the measure was obtained. i.e. SCQ-SOC-8; social communication subdomain measured at age 8 years. <sup>a</sup>The presence of the outcome from each questionnaire was indicated by a high score.

**eFigure 2. Covariate balance plot for adherence to a 'healthy' prenatal dietary pattern in ALSPAC**

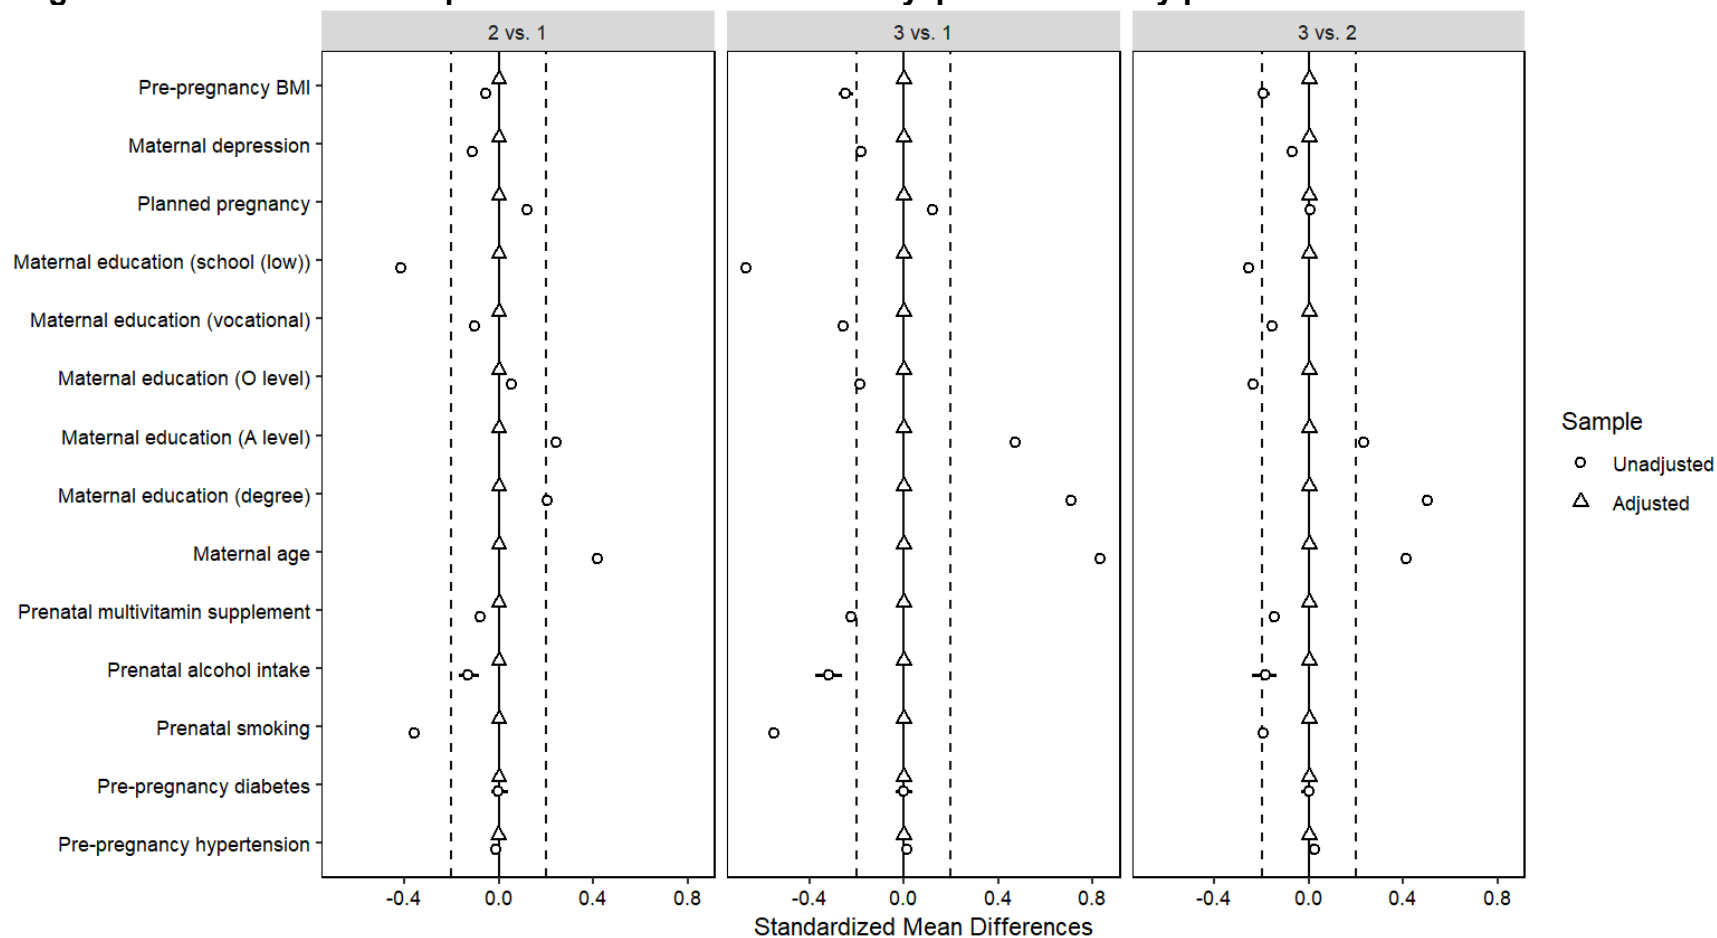

Good covariate balance was achieved.  $<0.1$  standardised mean difference indicates a negligible difference between exposure groups. The numbers 1, 2, and 3 indicate low, medium, and high adherence to a 'healthy' prenatal dietary pattern, respectively. Similar covariate balance was achieved in all additional models used in sensitivity analysis and plots are available on request. Furthermore, we observed representation of each covariate across all levels of a HPDP (Table 1 and eTable 8). There were no extreme weights observed. Entropy balancing calibrates the weights which best balance the measured systematic and random error of the covariates against a set of base weights which best retain information. Propensity score estimation, entropy balancing combines covariate balancing constraints into the weighting process. This reduces extreme weights and avoids poor covariate balance<sup>12</sup>

**eFigure 3. Covariate balance plot for adherence to a 'healthy' prenatal dietary pattern in MoBa**

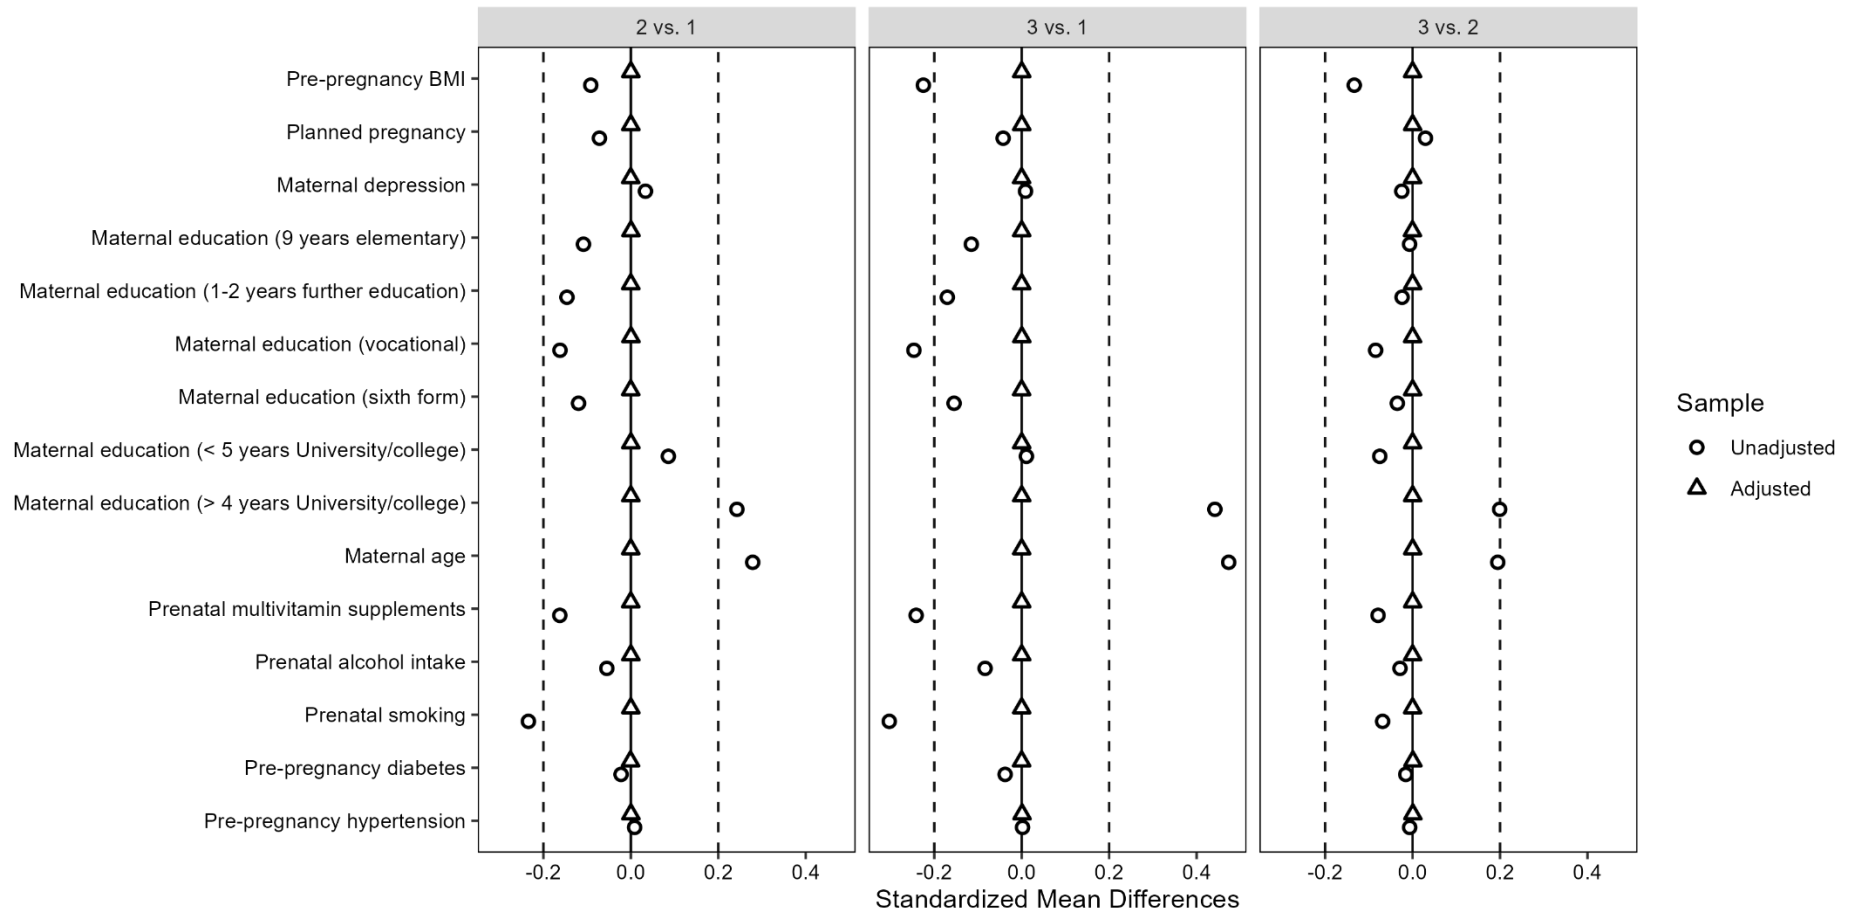

Good covariate balance was achieved.  $<0.1$  standardised mean difference indicates a negligible difference between exposure groups and there were no extreme weights. The numbers 1, 2, and 3 indicate low, medium, and high adherence to a 'healthy' prenatal dietary pattern, respectively. Similar covariate balance was achieved in all additional models used in sensitivity analysis and plots are available on request. Furthermore, we observed representation of each covariate across all levels of a HPDP (Table 1 and eTable 8).



**eTable 10. Unadjusted measures of association between a ‘healthy’ prenatal dietary pattern and autism diagnosis and autism-associated traits.**

| Outcome                       | <sup>b</sup> Adherence to ‘healthy’ prenatal dietary pattern | <sup>b</sup> OR (95% CI) unadjusted model |
|-------------------------------|--------------------------------------------------------------|-------------------------------------------|
| Autism diagnosis (MoBa)       | Medium                                                       | 0.71 (0.61, 0.83)                         |
| Autism diagnosis (MoBa)       | High                                                         | 0.68 (0.58, 0.80)                         |
| <sup>a</sup> SCQ-3 (MoBa)     | Medium                                                       | 0.85 (0.79, 0.91)                         |
| <sup>a</sup> SCQ-3 (MoBa)     | High                                                         | 0.86 (0.79, 0.93)                         |
| <sup>a</sup> SCQ-RRB-3 (MoBa) | Medium                                                       | 0.92 (0.85, 0.99)                         |
| <sup>a</sup> SCQ-RRB-3 (MoBa) | High                                                         | 1.05 (0.97, 1.14)                         |
| <sup>a</sup> SCQ-SOC-3 (MoBa) | Medium                                                       | 0.80 (0.76, 0.85)                         |
| <sup>a</sup> SCQ-SOC-3 (MoBa) | High                                                         | 0.68 (0.63, 0.73)                         |
| <sup>a</sup> SCQ-8 (MoBa)     | Medium                                                       | 0.86 (0.78, 0.94)                         |
| <sup>a</sup> SCQ-8 (MoBa)     | High                                                         | 0.80 (0.72, 0.88)                         |
| <sup>a</sup> SCQ-RRB-8 (MoBa) | Medium                                                       | 0.86 (0.80, 0.94)                         |
| <sup>a</sup> SCQ-RRB-8 (MoBa) | High                                                         | 0.87 (0.82, 0.93)                         |
| <sup>a</sup> SCQ-SOC-8 (MoBa) | Medium                                                       | 0.88 (0.80, 0.96)                         |
| <sup>a</sup> SCQ-SOC-8 (MoBa) | High                                                         | 0.79 (0.72, 0.88)                         |
| <sup>a</sup> SCDC-8 (ALSPAC)  | Medium                                                       | 0.68 (0.55, 0.84)                         |
| <sup>a</sup> SCDC-8 (ALSPAC)  | High                                                         | 0.59 (0.48, 0.74)                         |

ALSPAC, Avon Longitudinal Study of Parents and Children; MoBa, Norwegian Mother, Father, and Child Cohort; CI, confidence intervals; OR, odds ratio; SCQ-RRB, restrictive and repetitive behaviours subdomain of SCQ; SCDC, social communication disorders checklist; SCQ-SOC, communication skills subdomain of SCQ. The number following each outcome denotes the approximate age of the child in years when the measure was obtained. i.e. SCQ-SOC-8; social communication subdomain measured at age 8 years. <sup>a</sup>The presence of the outcome for each questionnaire was indicated by a high score an represents a high level of autism-associated traits (measured binary (yes/no). Autism was measured binary (yes/no). <sup>b</sup>The reference category is low adherence to a ‘healthy’ prenatal dietary pattern.

**eTable 11. Associations between a ‘healthy’ prenatal dietary pattern and autism diagnosis and autism-associated traits in MoBa and ALSPAC with a different adjustment set of covariates.**

| <sup>a</sup> Outcome    | <sup>b</sup> Adherence to ‘healthy’ prenatal dietary pattern | <sup>c</sup> SCQ uncorrected | <sup>d</sup> Additional covariates | <sup>e</sup> Paternal characteristics | <sup>f</sup> Birthyear | <sup>g</sup> Unadjusted for prenatal multivitamin supplements |
|-------------------------|--------------------------------------------------------------|------------------------------|------------------------------------|---------------------------------------|------------------------|---------------------------------------------------------------|
|                         |                                                              | OR (95% CI)                  | OR (95% CI)                        | OR (95% CI)                           | OR (95% CI)            | OR (95% CI)                                                   |
| Autism diagnosis (MoBa) | Medium                                                       |                              | 0.77 (0.65, 0.90)                  | 0.77 (0.65, 0.90)                     | 0.80 (0.68, 0.95)      | 0.78 (0.66, 0.92)                                             |
| Autism diagnosis (MoBa) | High                                                         |                              | 0.77 (0.65, 0.91)                  | 0.77 (0.65, 0.91)                     | 0.84 (0.71, 1.00)      | 0.79 (0.66, 0.93)                                             |
| SCQ-3 (MoBa)            | Medium                                                       | 0.95 (0.85, 1.07)            | 1.08 (0.98, 1.18)                  | 1.02 (0.94, 1.10)                     | 1.01 (0.93, 1.09)      | 1.01 (0.93, 1.09)                                             |
| SCQ-3 (MoBa)            | High                                                         | 1.08 (0.98, 1.20)            | 1.22 (1.12, 1.34)                  | 1.05 (0.95, 1.16)                     | 1.05 (0.96, 1.16)      | 1.05 (0.96, 1.15)                                             |
| SCQ-RRB-3 (MoBa)        | Medium                                                       | 1.00 (0.89, 1.12)            | 1.13 (1.02, 1.24)                  | 1.08 (1.01, 1.16)                     | 1.07 (1.00, 1.15)      | 1.08 (1.01, 1.15)                                             |
| SCQ-RRB-3 (MoBa)        | High                                                         | 1.37 (1.24, 1.51)            | 1.33 (1.20, 1.47)                  | 1.26 (1.17, 1.36)                     | 1.26 (1.16, 1.36)      | 1.26 (1.17, 1.36)                                             |
| SCQ-SOC-3 (MoBa)        | Medium                                                       | 0.95 (0.85, 1.05)            | 0.92 (0.85, 0.99)                  | 0.87 (0.82, 0.93)                     | 0.88 (0.82, 0.93)      | 0.87 (0.82, 0.92)                                             |
| SCQ-SOC-3 (MoBa)        | High                                                         | 1.07 (0.98, 1.17)            | 0.71 (0.66, 0.78)                  | 0.76 (0.70, 0.82)                     | 0.76 (0.70, 0.83)      | 0.76 (0.70, 0.82)                                             |
| SCQ-8 (MoBa)            | Medium                                                       | 0.92 (0.83, 1.02)            | 0.93 (0.85, 1.02)                  | 0.96 (0.88, 1.04)                     | 0.95 (0.87, 1.04)      | 0.95 (0.87, 1.03)                                             |
| SCQ-8 (MoBa)            | High                                                         | 0.96 (0.84, 1.09)            | 0.96 (0.86, 1.06)                  | 0.96 (0.87, 1.05)                     | 0.96 (0.88, 1.05)      | 0.95 (0.87, 1.04)                                             |
| SCQ-RRB-8 (MoBa)        | Medium                                                       | 0.90 (0.80, 1.02)            | 0.91 (0.82, 1.01)                  | 0.97 (0.90, 1.05)                     | 0.96 (0.89, 1.04)      | 0.97 (0.90, 1.05)                                             |
| SCQ-RRB-8 (MoBa)        | High                                                         | 1.07 (0.93, 1.24)            | 0.99 (0.89, 1.11)                  | 1.01 (0.94, 1.08)                     | 1.00 (0.92, 1.07)      | 1.01 (0.95, 1.08)                                             |
| SCQ-SOC-8 (MoBa)        | Medium                                                       | 0.94 (0.78, 1.13)            | 0.97 (0.89, 1.05)                  | 0.95 (0.87, 1.04)                     | 0.95 (0.87, 1.05)      | 0.95 (0.87, 1.03)                                             |
| SCQ-SOC-8 (MoBa)        | High                                                         | 0.98 (0.83, 1.17)            | 0.89 (0.81, 0.97)                  | 0.91 (0.82, 1.01)                     | 0.92 (0.83, 1.01)      | 0.90 (0.81, 1.00)                                             |
| SCDC-8 (ALSPAC)         | Medium                                                       |                              | 0.73 (0.59, 0.91)                  | 0.75 (0.60, 0.94)                     |                        | 0.80 (0.63, 1.03)                                             |
| SCDC-8 (ALSPAC)         | High                                                         |                              | 0.73 (0.54, 0.99)                  | 0.77 (0.57, 1.03)                     |                        | 0.81 (0.61, 1.06)                                             |

ALSPAC, Avon Longitudinal Study of Parents and Children; BMI, body mass index; MoBa, Norwegian Mother, Father, and Child Cohort; CI, confidence intervals; OR, odds ratio; SCQ-RRB, restrictive and repetitive behaviours subdomain of SCQ; SCDC, social communication disorders checklist; SCQ-SOC, communication skills subdomain of SCQ. The number following each outcome denotes the approximate age of the child in years when the measure was obtained. i.e. SCQ-SOC-8; social communication subdomain measured at age 8 years.

<sup>a</sup>The presence of the outcome from each questionnaire was indicated by a high score and represents a high level of autism-associated traits (measured binary (yes/no). Except autism which was binary (yes/no).

<sup>b</sup>The reference category is low adherence to a ‘healthy’ prenatal dietary pattern.

Model c adjusted for the same covariates as the main analysis which were: child sex, history of depression, maternal age, maternal education, planned pregnancy, prenatal alcohol intake, prenatal multivitamin supplement use, prenatal smoking, pre-pregnancy BMI, pre-pregnancy diabetes, pre-pregnancy hypertension. Model d adjusted for model c covariates and additionally adjusted for: eating disorder history, parity, anxiety (MoBa only), cohabitation (MoBa only), anxiety or depression medication (ALSPAC only), migraine medication (ALSPAC only), sleep medication (ALSPAC only), other psychiatric history (ALSPAC only). Model e adjusted for model c covariates and additionally adjusted for paternal age, paternal BMI, paternal education, paternal income (MoBa only). Model f adjusted for model c covariates and was additionally adjusted for birthyear. Model g adjusted for model c covariates but excluded prenatal multivitamin supplements.

**eTable 12. Associations between a ‘healthy’ prenatal dietary pattern and food groups with autism diagnosis and autism-associated traits in ALSPAC and MoBa**

| <sup>a</sup> Outcome    | <sup>b</sup> Level of adherence | 'Healthy' prenatal dietary pattern | 'Plant-based food group | 'Fish-based food group | 'Unhealthy' food group |
|-------------------------|---------------------------------|------------------------------------|-------------------------|------------------------|------------------------|
|                         |                                 | OR (95% CI)                        | OR (95% CI)             | OR (95% CI)            | OR (95% CI)            |
| Autism diagnosis (MoBa) | Medium                          | 0.77 (0.66, 0.91)                  | 0.94 (0.80, 1.10)       | 0.90 (0.77, 1.06)      | 0.89 (0.75, 1.05)      |
| Autism diagnosis (MoBa) | High                            | 0.78 (0.66, 0.92)                  | 0.91 (0.77, 1.08)       | 0.98 (0.83, 1.14)      | 1.05 (0.89, 1.24)      |
| SCQ-3 (MoBa)            | Medium                          | 1.02 (0.94, 1.10)                  | 1.00 (0.94, 1.07)       | 0.95 (0.89, 1.01)      | 0.93 (0.86, 1.00)      |
| SCQ-3 (MoBa)            | High                            | 1.06 (0.96, 1.16)                  | 1.07 (1.00, 1.15)       | 0.94 (0.88, 1.01)      | 0.94 (0.88, 1.00)      |
| SCQ-RRB-3 (MoBa)        | Medium                          | 1.08 (1.01, 1.16)                  | 1.07 (0.99, 1.15)       | 0.95 (0.89, 1.02)      | 1.09 (1.00, 1.18)      |
| SCQ-RRB-3 (MoBa)        | High                            | 1.27 (1.18, 1.37)                  | 1.26 (1.15, 1.37)       | 0.94 (0.87, 1.01)      | 1.11 (1.03, 1.20)      |
| SCQ-SOC-3 (MoBa)        | Medium                          | 0.87 (0.82, 0.93)                  | 0.86 (0.80, 0.92)       | 0.92 (0.86, 0.98)      | 1.09 (1.00, 1.18)      |
| SCQ-SOC-3 (MoBa)        | High                            | 0.76 (0.70, 0.82)                  | 0.80 (0.74, 0.86)       | 0.95 (0.89, 1.02)      | 1.11 (1.03, 1.20)      |
| SCQ-8 (MoBa)            | Medium                          | 0.96 (0.88, 1.04)                  | 0.92 (0.86, 0.98)       | 0.93 (0.85, 1.01)      | 0.95 (0.87, 1.02)      |
| SCQ-8 (MoBa)            | High                            | 0.96 (0.88, 1.05)                  | 0.92 (0.86, 0.99)       | 0.95 (0.89, 1.02)      | 0.97 (0.89, 1.06)      |
| SCQ-RRB-8 (MoBa)        | Medium                          | 0.97 (0.90, 1.05)                  | 0.98 (0.92, 1.04)       | 0.94 (0.89, 1.00)      | 0.94 (0.89, 1.00)      |
| SCQ-RRB-8 (MoBa)        | High                            | 1.01 (0.95, 1.08)                  | 1.03 (0.97, 1.09)       | 0.93 (0.88, 0.99)      | 1.00 (0.95, 1.06)      |
| SCQ-SOC-8 (MoBa)        | Medium                          | 0.96 (0.87, 1.04)                  | 0.93 (0.86, 1.00)       | 0.96 (0.88, 1.05)      | 1.00 (0.91, 1.09)      |
| SCQ-SOC-8 (MoBa)        | High                            | 0.91 (0.82, 1.01)                  | 0.89 (0.82, 0.96)       | 0.98 (0.88, 1.08)      | 1.01 (0.93, 1.10)      |
| SCDC-8 (ALSPAC)         | Medium                          | 0.73 (0.59, 0.91)                  | 0.76 (0.62, 0.94)       | 0.87 (0.74, 1.04)      | 1.10 (0.89, 1.36)      |
| SCDC-8 (ALSPAC)         | High                            | 0.74 (0.55, 0.98)                  | 0.83 (0.66, 1.04)       | 0.87 (0.68, 1.10)      | 1.21 (0.99, 1.49)      |

CI, confidence intervals; OR, odds ratio; SCDC, social communication disorders checklist; SCQ-RRB, restrictive and repetitive behaviours domain of SCQ; SCDC, social communication disorders checklist; SCQ-SOC, communication skills domain of SCQ; SCQ, social communication questionnaire. The number following each outcome denotes the child's age in years when the measure was obtained.

<sup>a</sup>Autism was measured binary (yes/no) and high SCQ and SCDC score indicates greater difficulties and represents a high level of autism-associated traits (measured binary (yes/no)).

<sup>b</sup>The reference category is low adherence to a 'healthy' prenatal dietary pattern.

Adjusted covariates in each model; child sex, history of depression, maternal age, maternal education, planned pregnancy, prenatal alcohol intake, prenatal multivitamin supplement use, prenatal smoking, pre-pregnancy BMI, pre-pregnancy diabetes, pre-pregnancy hypertension. Each of the food groups (plant-based, fish-based, 'unhealthy') were simultaneous adjusted for each other.

<sup>c</sup>The correlation between each food group as a continuous score was below 0.50.

**eTable 13. Associations between a ‘healthy’ prenatal dietary pattern with autism diagnosis and autism-associated traits in MoBa and ALSPAC: analyses are stratified by prenatal multivitamin supplement use, pre-pregnancy BMI, child sex and maternal education**

| <sup>a</sup> Outcome           | <sup>b, c</sup> Maternal education    |                   | <sup>b, c</sup> Prenatal supplement use |                   | <sup>b, c</sup> Pre-pregnancy BMI    |                   | <sup>b, c</sup> Child sex             |                   |
|--------------------------------|---------------------------------------|-------------------|-----------------------------------------|-------------------|--------------------------------------|-------------------|---------------------------------------|-------------------|
|                                | Subgroup                              | OR (95% CI)       | Subgroup                                | OR (95% CI)       | Subgroup                             | OR (95% CI)       | Subgroup                              | OR (95% CI)       |
| <b>Autism diagnosis (MoBa)</b> | $P = 0.93$ , $D^2$ -statistic = 0.07  |                   | $P = 0.83$ , $D^2$ -statistic = 0.18    |                   | $P = 0.47$ , $D^2$ -statistic = 0.76 |                   | $P = 0.11$ , $D^2$ -statistic = 2.22  |                   |
| Medium                         | < Degree                              | 0.78 (0.59, 1.03) | Yes                                     | 0.74 (0.55, 0.99) | < 25 kg/m <sup>2</sup>               | 0.78 (0.63, 0.96) | Male                                  | 0.73 (0.61, 0.87) |
| High                           | < Degree                              | 0.77 (0.60, 1.00) | Yes                                     | 0.76 (0.57, 1.02) | < 25 kg/m <sup>2</sup>               | 0.82 (0.66, 1.01) | Male                                  | 0.78 (0.65, 0.94) |
| Medium                         | ≥ Degree                              | 0.77 (0.60, 0.99) | No                                      | 0.80 (0.66, 0.96) | ≥ 25 kg/m <sup>2</sup>               | 0.78 (0.61, 1.00) | Female                                | 0.99 (0.71, 1.40) |
| High                           | ≥ Degree                              | 0.77 (0.61, 0.97) | No                                      | 0.77 (0.63, 0.95) | ≥ 25 kg/m <sup>2</sup>               | 0.68 (0.51, 0.90) | Female                                | 0.71 (0.48, 1.05) |
| <b>SCQ-3 (MoBa)</b>            | $P = 0.01$ , $D^2$ -statistic = 4.80  |                   | $P = 0.01$ , $D^2$ -statistic = 4.60    |                   | $P = 0.78$ , $D^2$ -statistic = 0.25 |                   | $P = 0.007$ , $D^2$ -statistic = 5.47 |                   |
| Medium                         | < Degree                              | 0.95 (0.85, 1.05) | Yes                                     | 0.90 (0.78, 1.05) | < 25 kg/m <sup>2</sup>               | 0.98 (0.90, 1.07) | Male                                  | 0.96 (0.87, 1.05) |
| High                           | < Degree                              | 0.96 (0.85, 1.08) | Yes                                     | 1.14 (0.98, 1.33) | < 25 kg/m <sup>2</sup>               | 1.07 (0.98, 1.16) | Male                                  | 0.96 (0.87, 1.06) |
| Medium                         | ≥ Degree                              | 1.04 (0.94, 1.16) | No                                      | 1.02 (0.94, 1.10) | ≥ 25 kg/m <sup>2</sup>               | 1.00 (0.89, 1.13) | Female                                | 1.04 (0.91, 1.19) |
| High                           | ≥ Degree                              | 1.17 (1.03, 1.33) | No                                      | 1.03 (0.95, 1.12) | ≥ 25 kg/m <sup>2</sup>               | 1.05 (0.91, 1.22) | Female                                | 1.26 (1.09, 1.46) |
| <b>SCQ-RRB-3 (MoBa)</b>        | $P = 0.51$ , $D^2$ -statistic = 0.68  |                   | $P = 0.13$ , $D^2$ -statistic = 2.05    |                   | $P = 0.52$ , $D^2$ -statistic = 0.66 |                   | $P = 0.20$ , $D^2$ -statistic = 1.64  |                   |
| Medium                         | < Degree                              | 1.08 (0.94, 1.23) | Yes                                     | 0.98 (0.83, 1.15) | < 25 kg/m <sup>2</sup>               | 1.07 (0.98, 1.17) | Male                                  | 1.06 (0.96, 1.17) |
| High                           | < Degree                              | 1.26 (1.09, 1.44) | Yes                                     | 1.33 (1.16, 1.53) | < 25 kg/m <sup>2</sup>               | 1.32 (1.20, 1.45) | Male                                  | 1.22 (1.12, 1.33) |
| Medium                         | ≥ Degree                              | 1.04 (0.94, 1.15) | No                                      | 1.08 (1.00, 1.18) | ≥ 25 kg/m <sup>2</sup>               | 1.04 (0.91, 1.18) | Female                                | 1.06 (0.94, 1.19) |
| High                           | ≥ Degree                              | 1.32 (1.17, 1.48) | No                                      | 1.26 (1.16, 1.38) | ≥ 25 kg/m <sup>2</sup>               | 1.21 (1.06, 1.39) | Female                                | 1.39 (1.21, 1.61) |
| <b>SCQ-SOC-3 (MoBa)</b>        | $P = 0.34$ , $D^2$ -statistic = 1.09  |                   | $P = 0.73$ , $D^2$ -statistic = 0.32    |                   | $P = 0.16$ , $D^2$ -statistic = 1.85 |                   | $P = 0.001$ , $D^2$ -statistic = 7.86 |                   |
| Medium                         | < Degree                              | 0.81 (0.73, 0.90) | Yes                                     | 0.86 (0.75, 0.97) | < 25 kg/m <sup>2</sup>               | 0.82 (0.77, 0.88) | Male                                  | 0.83 (0.77, 0.91) |
| High                           | < Degree                              | 0.72 (0.63, 0.81) | Yes                                     | 0.77 (0.68, 0.89) | < 25 kg/m <sup>2</sup>               | 0.73 (0.67, 0.80) | Male                                  | 0.67 (0.62, 0.73) |
| Medium                         | ≥ Degree                              | 0.90 (0.82, 0.99) | No                                      | 0.87 (0.81, 0.93) | ≥ 25 kg/m <sup>2</sup>               | 0.94 (0.84, 1.06) | Female                                | 0.92 (0.83, 1.01) |
| High                           | ≥ Degree                              | 0.77 (0.70, 0.86) | No                                      | 0.74 (0.68, 0.81) | ≥ 25 kg/m <sup>2</sup>               | 0.77 (0.69, 0.87) | Female                                | 0.90 (0.79, 1.02) |
| <b>SCQ-8 (MoBa)</b>            | $P = 0.006$ , $D^2$ -statistic = 5.49 |                   | $P = 0.93$ , $D^2$ -statistic = 0.08    |                   | $P = 0.25$ , $D^2$ -statistic = 1.42 |                   | $P = 0.05$ , $D^2$ -statistic = 3.16  |                   |
| Medium                         | < Degree                              | 0.85 (0.74, 0.97) | Yes                                     | 0.96 (0.83, 1.12) | < 25 kg/m <sup>2</sup>               | 1.00 (0.90, 1.11) | Male                                  | 0.90 (0.81, 0.99) |
| High                           | < Degree                              | 0.95 (0.84, 1.08) | Yes                                     | 0.95 (0.80, 1.14) | < 25 kg/m <sup>2</sup>               | 0.95 (0.85, 1.06) | Male                                  | 0.95 (0.85, 1.07) |
| Medium                         | ≥ Degree                              | 1.04 (0.94, 1.15) | No                                      | 0.95 (0.85, 1.06) | ≥ 25 kg/m <sup>2</sup>               | 0.87 (0.75, 1.01) | Female                                | 1.07 (0.93, 1.24) |
| High                           | ≥ Degree                              | 0.91 (0.81, 1.01) | No                                      | 0.92 (0.83, 1.02) | ≥ 25 kg/m <sup>2</sup>               | 0.90 (0.79, 1.04) | Female                                | 0.88 (0.72, 1.07) |
| <b>SCQ-RRB-8 (MoBa)</b>        | $P = 0.08$ , $D^2$ -statistic = 2.75  |                   | $P = 0.40$ , $D^2$ -statistic = 0.94    |                   | $P = 0.27$ , $D^2$ -statistic = 1.36 |                   | $P = 0.11$ , $D^2$ -statistic = 2.26  |                   |
| Medium                         | < Degree                              | 0.90 (0.79, 1.01) | Yes                                     | 0.97 (0.86, 1.10) | < 25 kg/m <sup>2</sup>               | 0.94 (0.87, 1.02) | Male                                  | 0.95 (0.85, 1.07) |

| <sup>a</sup> Outcome    | <sup>b, c</sup> Maternal education                       |                   | <sup>b, c</sup> Prenatal supplement use                  |                   | <sup>b, c</sup> Pre-pregnancy BMI                         |                   | <sup>b, c</sup> Child sex                                |                   |
|-------------------------|----------------------------------------------------------|-------------------|----------------------------------------------------------|-------------------|-----------------------------------------------------------|-------------------|----------------------------------------------------------|-------------------|
|                         | Subgroup                                                 | OR (95% CI)       | Subgroup                                                 | OR (95% CI)       | Subgroup                                                  | OR (95% CI)       | Subgroup                                                 | OR (95% CI)       |
| High                    | < Degree                                                 | 0.93 (0.81, 1.06) | Yes                                                      | 1.04 (0.91, 1.19) | < 25 kg/m <sup>2</sup>                                    | 1.03 (0.95, 1.12) | Male                                                     | 0.95 (0.86, 1.04) |
| Medium                  | ≥ Degree                                                 | 1.00 (0.90, 1.12) | No                                                       | 0.95 (0.86, 1.04) | ≥ 25 kg/m <sup>2</sup>                                    | 0.96 (0.83, 1.12) | Female                                                   | 0.95 (0.86, 1.04) |
| High                    | ≥ Degree                                                 | 1.06 (0.96, 1.17) | No                                                       | 0.98 (0.92, 1.06) | ≥ 25 kg/m <sup>2</sup>                                    | 0.93 (0.85, 1.03) | Female                                                   | 1.08 (0.98, 1.20) |
| <b>SCQ-SOC-8 (MoBa)</b> | <i>P</i> = 0.27, <i>D</i> <sup>2</sup> -statistic = 1.35 |                   | <i>P</i> = 0.34, <i>D</i> <sup>2</sup> -statistic = 1.11 |                   | <i>P</i> = 0.024, <i>D</i> <sup>2</sup> -statistic = 3.97 |                   | <i>P</i> = 0.02, <i>D</i> <sup>2</sup> -statistic = 4.42 |                   |
| Medium                  | < Degree                                                 | 0.88 (0.77, 1.01) | Yes                                                      | 1.03 (0.82, 1.29) | < 25 kg/m <sup>2</sup>                                    | 1.03 (0.91, 1.16) | Male                                                     | 0.90 (0.82, 0.99) |
| High                    | < Degree                                                 | 0.88 (0.76, 1.02) | Yes                                                      | 1.01 (0.81, 1.27) | < 25 kg/m <sup>2</sup>                                    | 0.91 (0.79, 1.04) | Male                                                     | 0.92 (0.82, 1.04) |
| Medium                  | ≥ Degree                                                 | 0.99 (0.88, 1.12) | No                                                       | 0.93 (0.84, 1.03) | ≥ 25 kg/m <sup>2</sup>                                    | 0.81 (0.71, 0.92) | Female                                                   | 1.04 (0.90, 1.21) |
| High                    | ≥ Degree                                                 | 0.88 (0.78, 0.99) | No                                                       | 0.85 (0.76, 0.94) | ≥ 25 kg/m <sup>2</sup>                                    | 0.86 (0.73, 1.01) | Female                                                   | 0.82 (0.70, 0.96) |
| <b>SCDC-8 (ALSPAC)</b>  | <i>P</i> = 0.21, <i>D</i> <sup>2</sup> -statistic = 1.57 |                   | <i>P</i> = 0.35, <i>D</i> <sup>2</sup> -statistic = 1.07 |                   | <i>P</i> = 0.19, <i>D</i> <sup>2</sup> -statistic = 1.69  |                   | <i>P</i> = 0.04, <i>D</i> <sup>2</sup> -statistic = 3.36 |                   |
| Medium                  | ≥ A levels                                               | 0.57 (0.38, 0.87) | No                                                       | 0.57 (0.38, 0.87) | < 25 kg/m <sup>2</sup>                                    | 0.57 (0.38, 0.87) | Male                                                     | 0.81 (0.61, 1.06) |
| High                    | ≥ A levels                                               | 0.59 (0.36, 0.96) | No                                                       | 0.59 (0.36, 0.96) | < 25 kg/m <sup>2</sup>                                    | 0.59 (0.36, 0.96) | Male                                                     | 0.89 (0.67, 1.19) |
| Medium                  | < A levels                                               | 0.86 (0.66, 1.12) | Yes                                                      | 0.86 (0.66, 1.12) | ≥ 25 kg/m <sup>2</sup>                                    | 0.86 (0.66, 1.12) | Female                                                   | 0.71 (0.48, 1.06) |
| High                    | < A levels                                               | 0.82 (0.62, 1.08) | Yes                                                      | 0.82 (0.62, 1.08) | ≥ 25 kg/m <sup>2</sup>                                    | 0.82 (0.62, 1.08) | Female                                                   | 0.48 (0.33, 0.70) |

CI, confidence intervals; OR, odds ratio; P, p-value; SCDC, social communication disorders checklist; SCQ-RRB, restrictive and repetitive behaviours domain of SCQ; SCDC, social communication disorders checklist; SCQ-SOC, communication skills domain of SCQ; SCQ, social communication questionnaire. The number following each outcome denotes the child's age in years when the measure was obtained.

<sup>a</sup>Autism was measured binary (yes/no). High SCQ and SCDC score indicates greater difficulties and represents a high level of autism-associated traits (measured binary (yes/no)).

<sup>b</sup>The reference category is low adherence to a 'healthy' prenatal dietary pattern.

<sup>c</sup>Adjusted covariates in each model; child sex, history of depression, maternal age, maternal education, planned pregnancy, prenatal alcohol intake, prenatal multivitamin supplement use, prenatal smoking, pre-pregnancy BMI, pre-pregnancy diabetes, pre-pregnancy hypertension.

**eTable 14. Complete case analyses measuring the associations between adherence to a 'healthy' prenatal dietary pattern and autism diagnosis and autism-associated traits in MoBa.**

| <sup>a</sup> Outcome         | Total sample (cases) | <sup>b</sup> Adherence to a healthy prenatal dietary pattern | <sup>c</sup> OR (95% CI) |
|------------------------------|----------------------|--------------------------------------------------------------|--------------------------|
| Autism diagnosis (MoBa)      | 58553 (393)          | Medium                                                       | 0.80 (0.62, 1.02)        |
| Autism diagnosis (MoBa)      | 58553 (393)          | High                                                         | 0.74 (0.57, 0.95)        |
| High SCQ-3 score (MoBa)      | 32362 (2023)         | Medium                                                       | 1.03 (0.92, 1.16)        |
| High SCQ-3 score (MoBa)      | 32362 (2023)         | High                                                         | 1.16 (1.03, 1.31)        |
| High SCQ-RRB- 3 score (MoBa) | 32341 (1590)         | Medium                                                       | 1.03 (0.90, 1.19)        |
| High SCQ-RRB- 3 score (MoBa) | 32341 (1590)         | High                                                         | 1.45 (1.26, 1.66)        |
| High SCQ-SOC- 3 score (MoBa) | 32296 (1924)         | Medium                                                       | 0.89 (0.80, 1.01)        |
| High SCQ-SOC- 3 score (MoBa) | 32296 (1924)         | High                                                         | 0.72 (0.63, 0.82)        |
| High SCQ-8 score (MoBa)      | 26215 (1304)         | Medium                                                       | 1.03 (0.90, 1.19)        |
| High SCQ-8 score (MoBa)      | 26215 (1304)         | High                                                         | 0.88 (0.76, 1.03)        |
| High SCQ-RRB- 8 score (MoBa) | 26215 (1833)         | Medium                                                       | 0.98 (0.82, 1.18)        |
| High SCQ-RRB- 8 score (MoBa) | 26215 (1833)         | High                                                         | 1.14 (0.95, 1.37)        |
| High SCQ-SOC- 8 score (MoBa) | 26215 (1054)         | Medium                                                       | 1.10 (0.94, 1.28)        |
| High SCQ-SOC- 8 score (MoBa) | 26215 (1054)         | High                                                         | 0.90 (0.76, 1.07)        |

CI, confidence intervals; OR, odds ratio; SCDC, social communication disorders checklist; SCQ-RRB, restrictive and repetitive behaviours domain of SCQ; SCDC, social communication disorders checklist; SCQ-SOC, communication skills domain of SCQ; SCQ, social communication questionnaire. The number following each outcome denotes the child's age in years when the measure was obtained.

<sup>a</sup>Autism diagnosis was measured binary (yes/no). High SCQ and SCDC score indicates greater difficulties and represents a high level of autism-associated traits (measured binary (yes/no)).

<sup>b</sup>The reference category is low adherence to a 'healthy' prenatal dietary pattern.

<sup>c</sup>Adjusted covariates in each model; child sex, history of depression, maternal age, maternal education, planned pregnancy, prenatal alcohol intake, prenatal multivitamin supplement use, prenatal smoking, pre-pregnancy BMI, pre-pregnancy diabetes, pre-pregnancy hypertension.

## eReferences

1. The NORBAGREEN 2002 study: Consumption of vegetables, potatoes, fruit, bread and fish in the Nordic and Baltic countries (NORDIC COUNCIL OF MINISTERS: FOOD) (2003).
2. Lang R, Thane CW, Bolton-Smith C, Jebb SA. Consumption of whole-grain foods by British adults: findings from further analysis of two national dietary surveys. *Public Health Nutrition*. 2003;6(5):479-484.
3. Whitton C, Nicholson SK, Roberts C, et al. National Diet and Nutrition Survey: UK food consumption and nutrient intakes from the first year of the rolling programme and comparisons with previous surveys. *Br J Nutr*. Dec 2011;106(12):1899-914.
4. Foodcalc v 1.3 diet, cancer and health project. Danish Cancer Society; 1998.
5. Norwegian Food Safety Authority. The Norwegian Food Composition Table Norwegian Food Safety Authority; 2005.
6. Ministry of Agriculture and Food. Food Portion Sizes. HMSO; 1991.
7. Rogers I, Emmett P, Team AS. Diet during pregnancy in a population of pregnant women in South West England. *European Journal of Clinical Nutrition*. 1998;52(4):246-250.
8. Brantsaeter AL, Garthus-Niegel S, Brandlistuen RE, Caspersen IH, Meltzer HM, Abel MH. Mild-to-moderate iodine deficiency and symptoms of emotional distress and depression in pregnancy and six months postpartum – Results from a large pregnancy cohort. *Journal of Affective Disorders*. 2022;318:347-356.
9. Hu FB. Dietary pattern analysis: a new direction in nutritional epidemiology. *Current Opinion in Lipidology*. 2002;13(1):3-9.
10. Allison PD. Missing data. Sage; 2002.
11. Grund S, Lüdtke O, Robitzsch A. Pooling ANOVA Results From Multiply Imputed Datasets. *Methodology*. 2016;12(3):75-88.
12. Hainmueller J. Entropy Balancing for Causal Effects: A Multivariate Reweighting Method to Produce Balanced Samples in Observational Studies. *Political Analysis*. 2012;20(1):25-46.
